# Supplementary material for: GRASP55 regulates intra‐Golgi localization of glycosylation enzymes to control glycosphingolipid biosynthesis
Source: PubMed Central journal article supplement — EMBO J. 2021 Sep 13;40(20):e107766. doi: 10.15252/embj.2021107766 (PMC8521277; doi:10.15252/embj.2021107766), 2021-09-13

# SOURCE DATA 4A

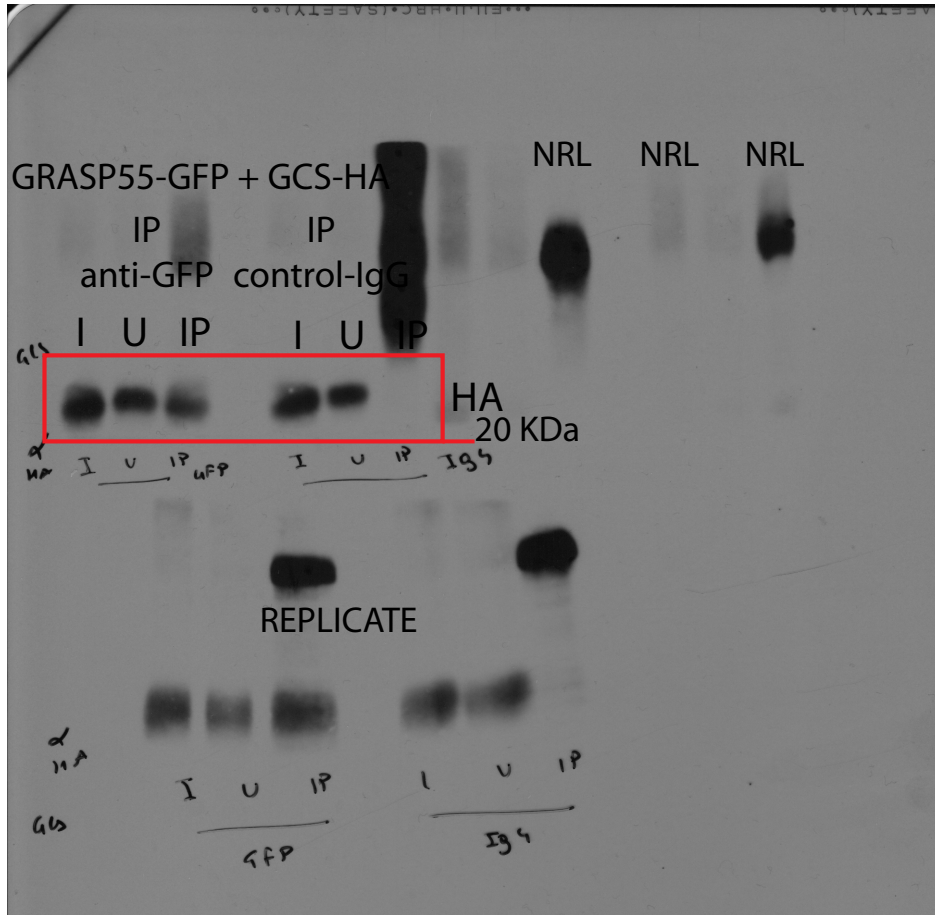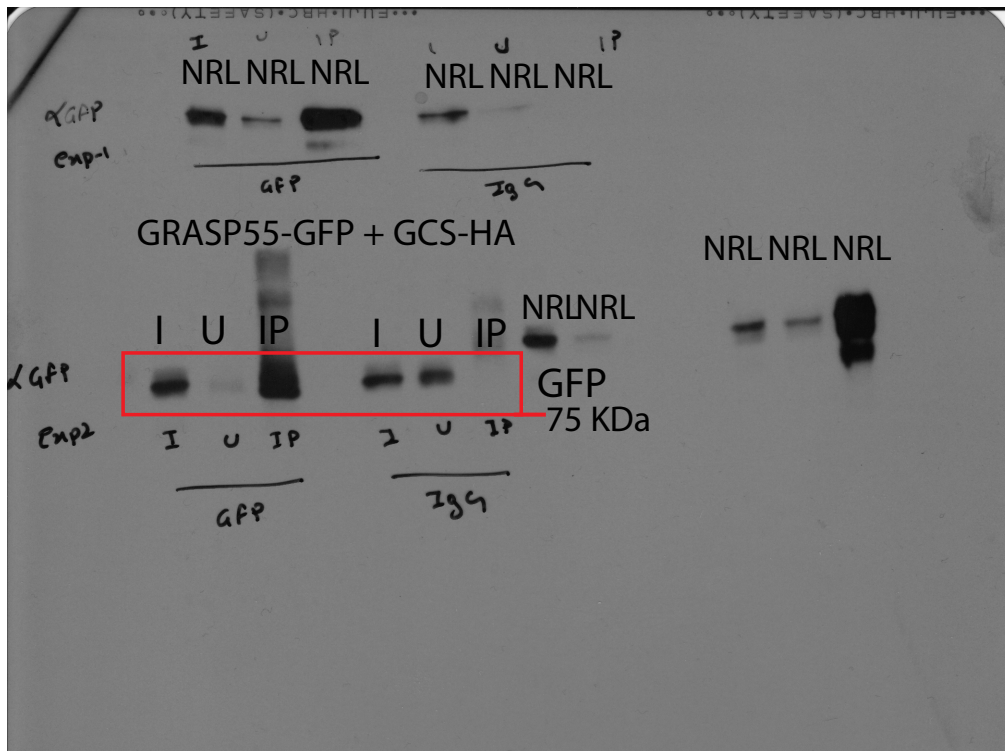

# SOURCE DATA 4A

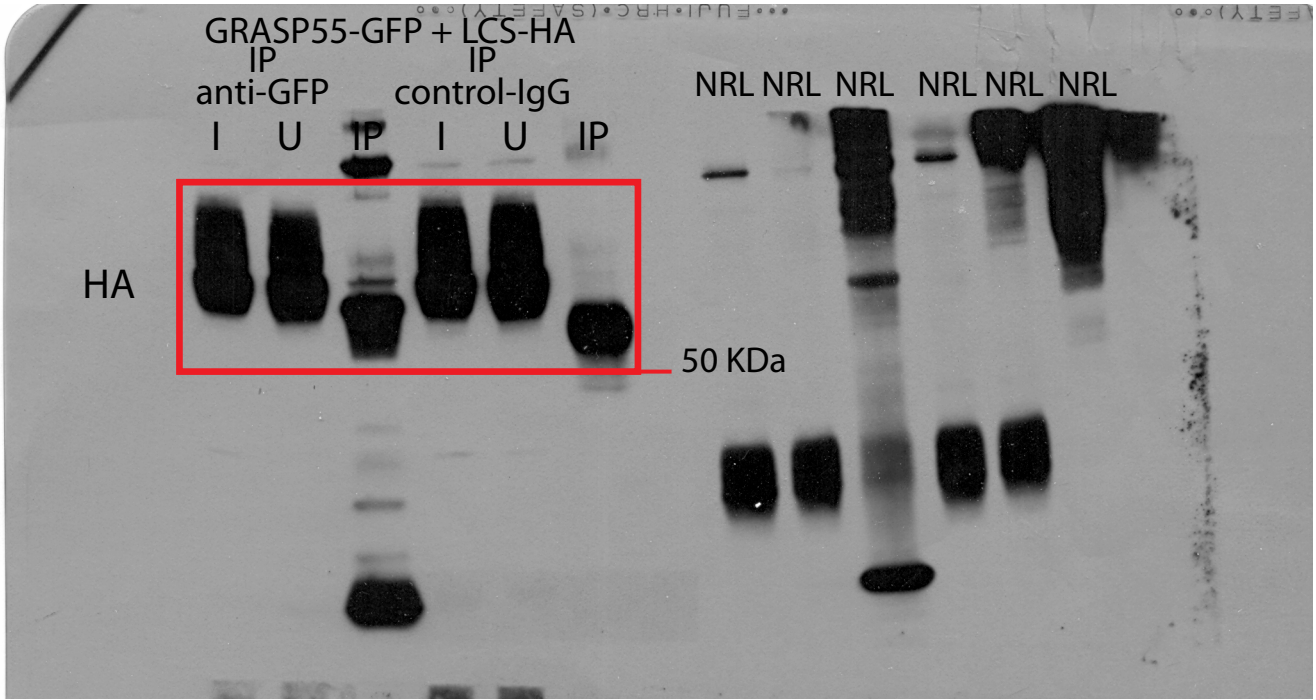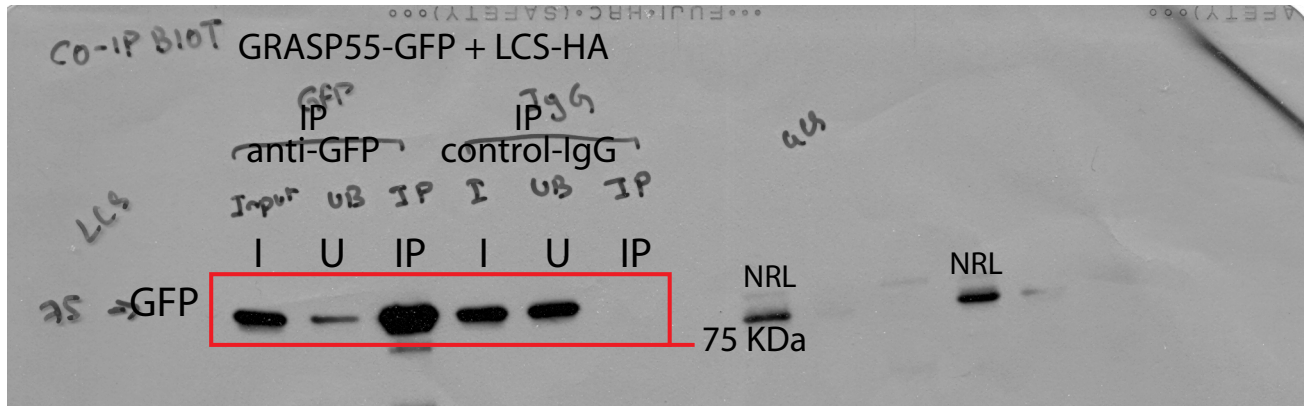



# SOURCE DATA 4A

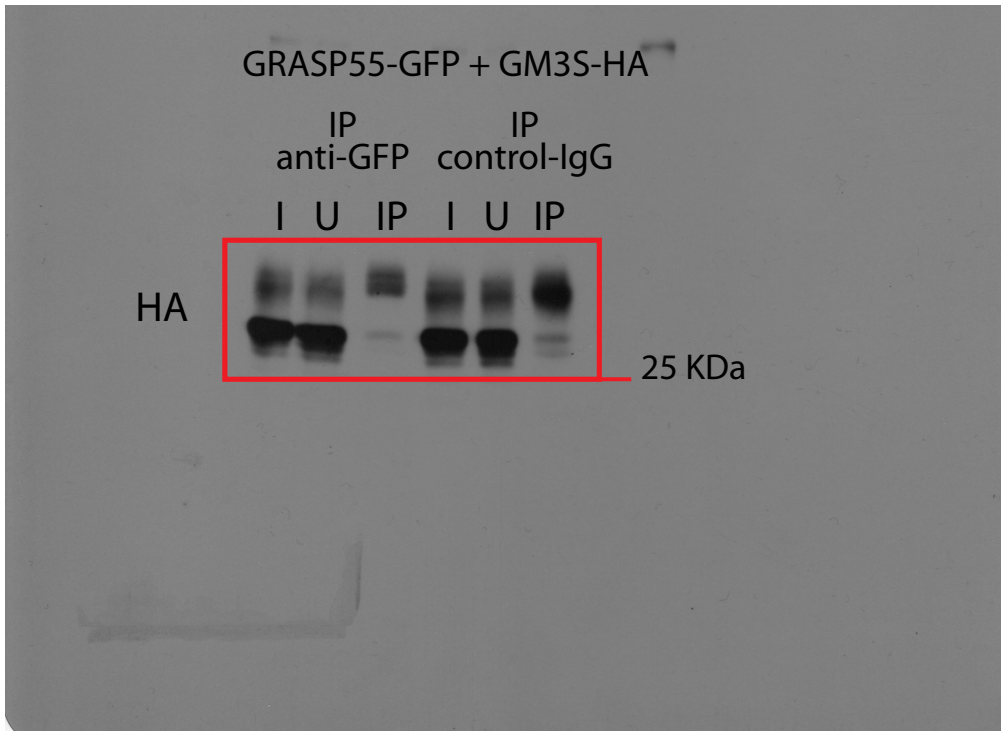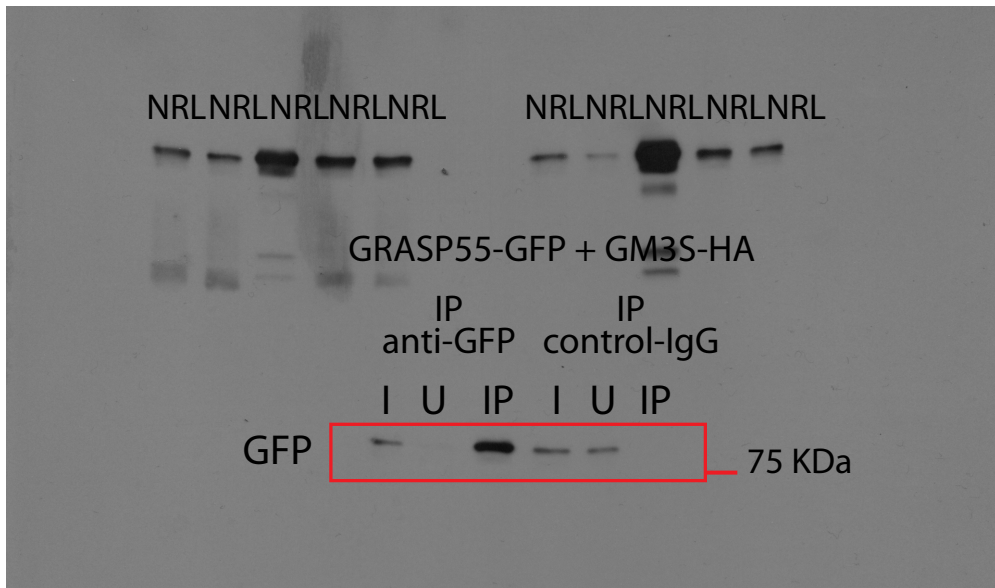

# SOURCE DATA 4A

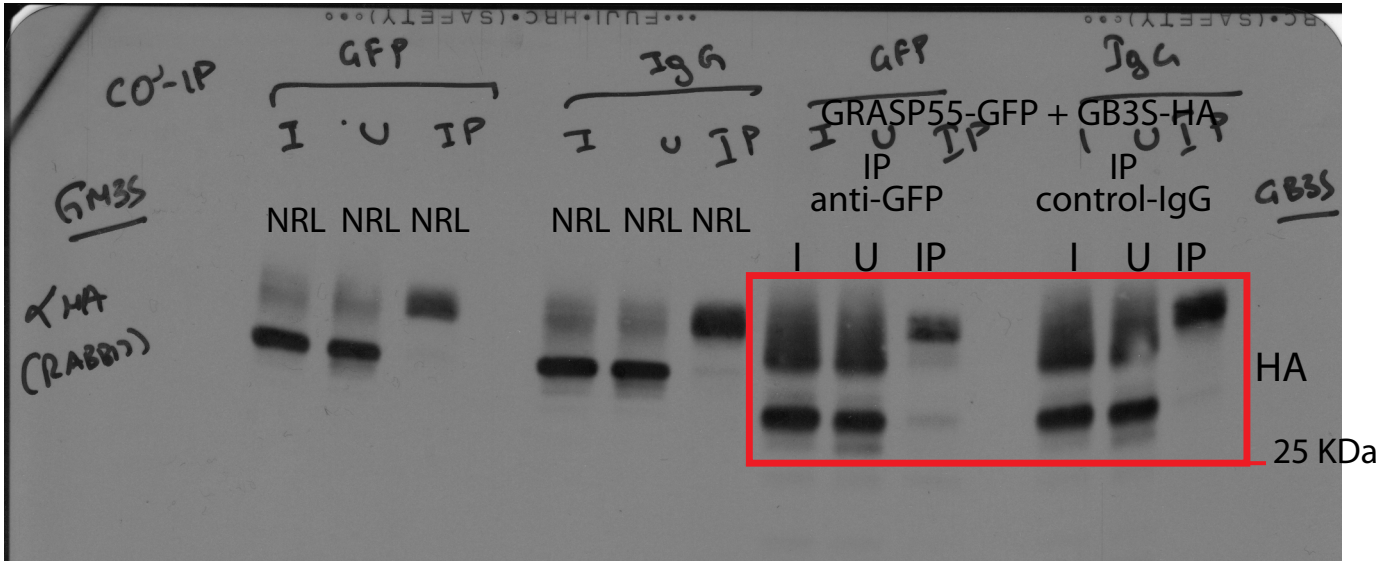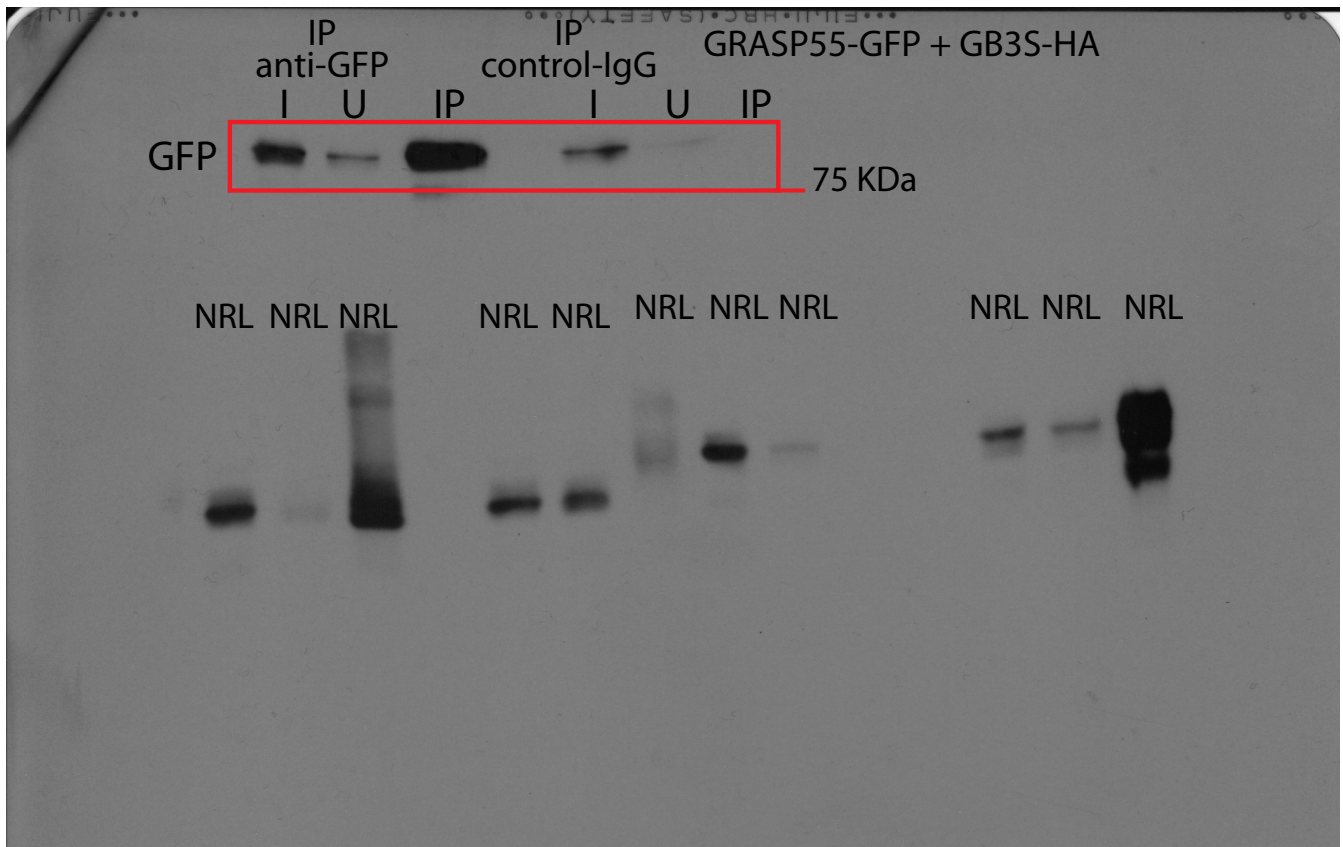

# SOURCE DATA 4B

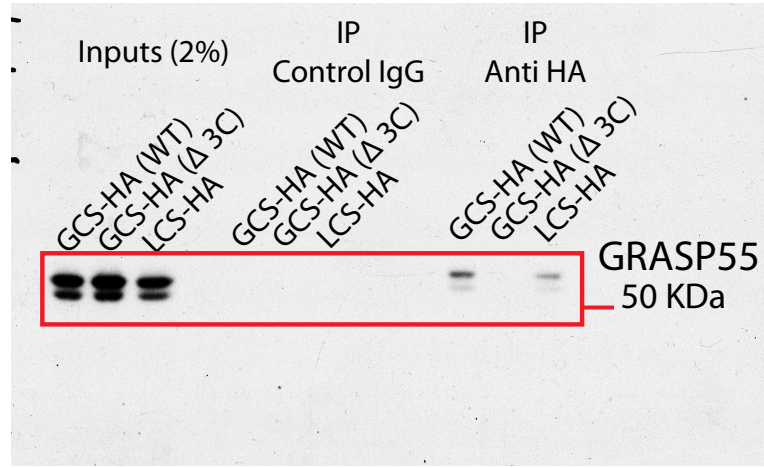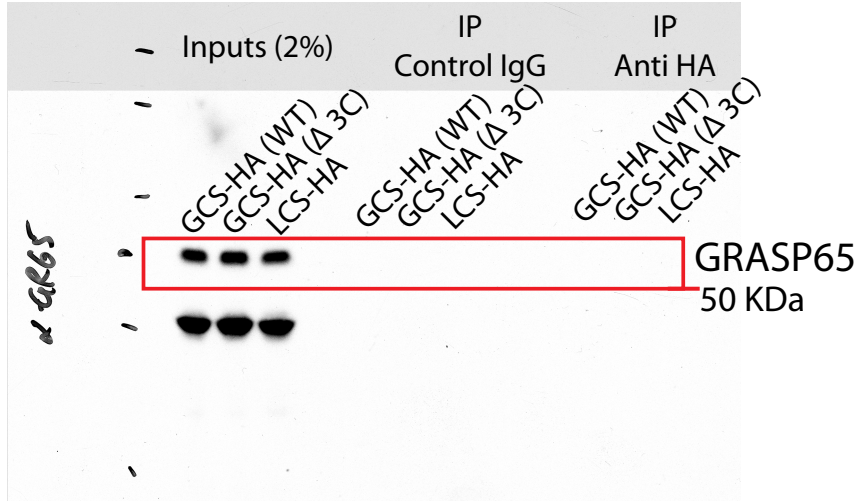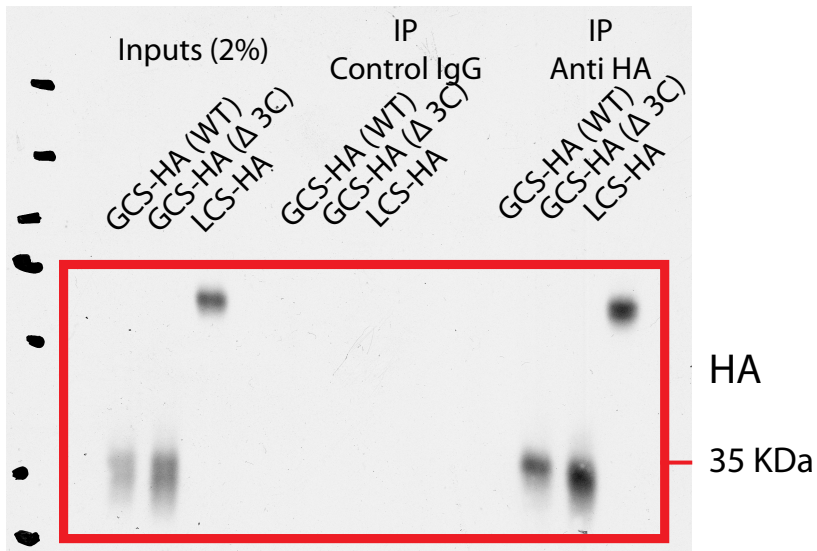



# SOURCE DATA 4C

Pull down with  
biotinylated cytosolic tails

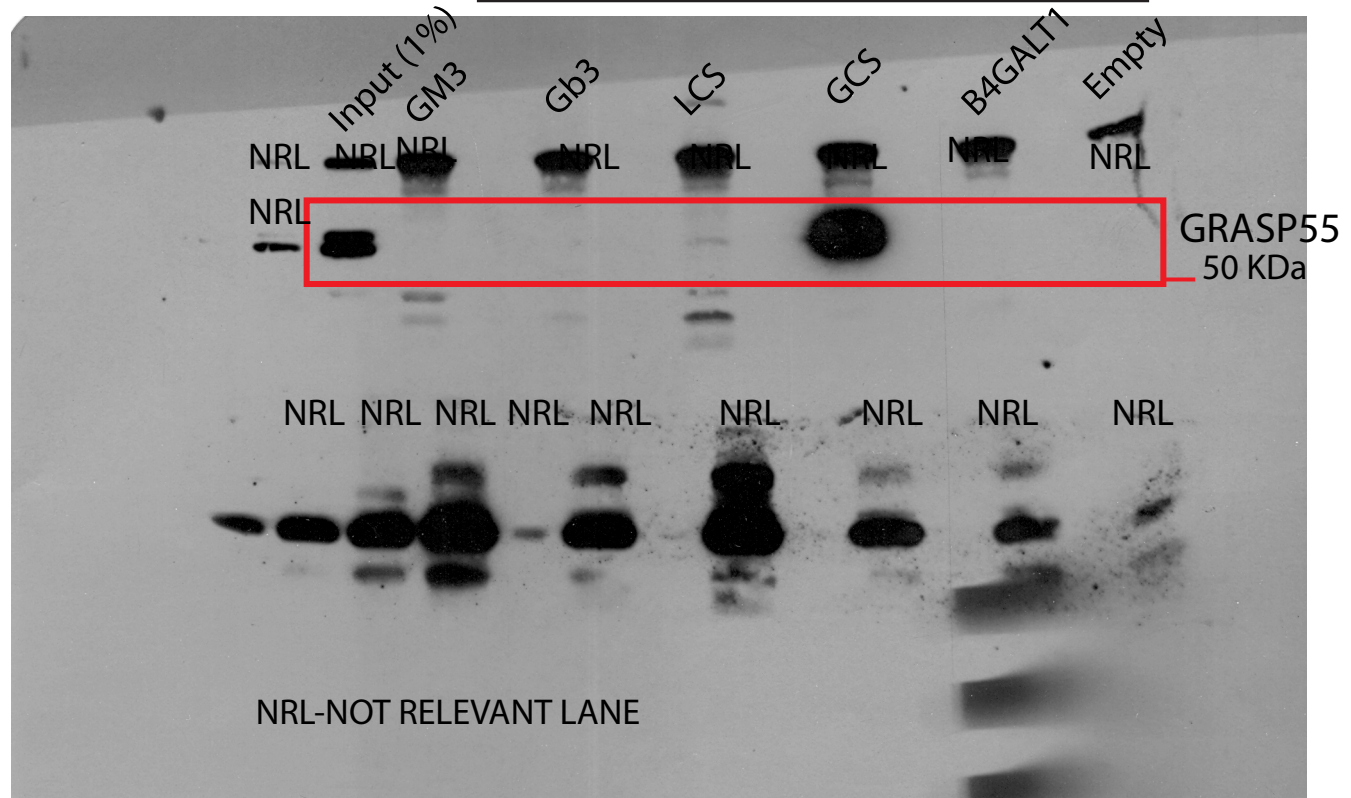

# SOURCE DATA 4D

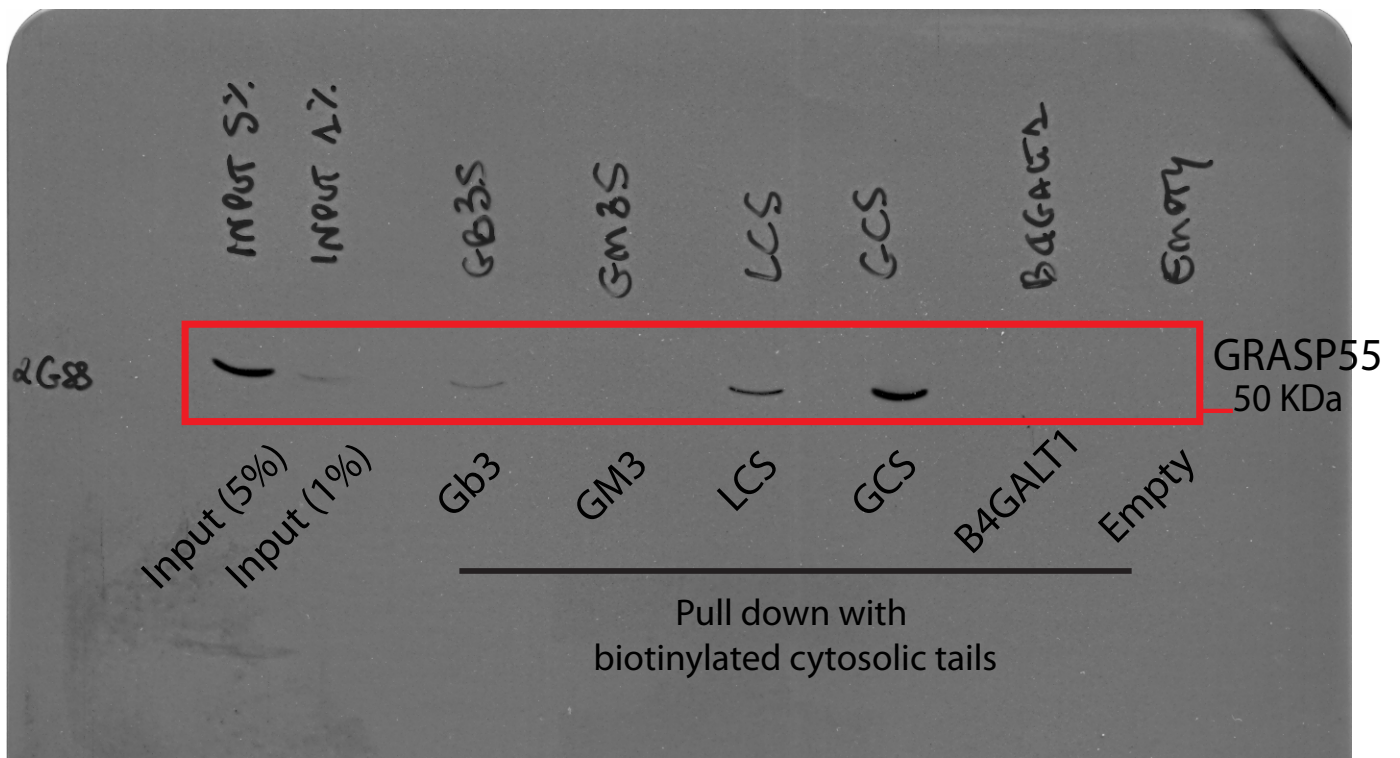

# SOURCE DATA 4E

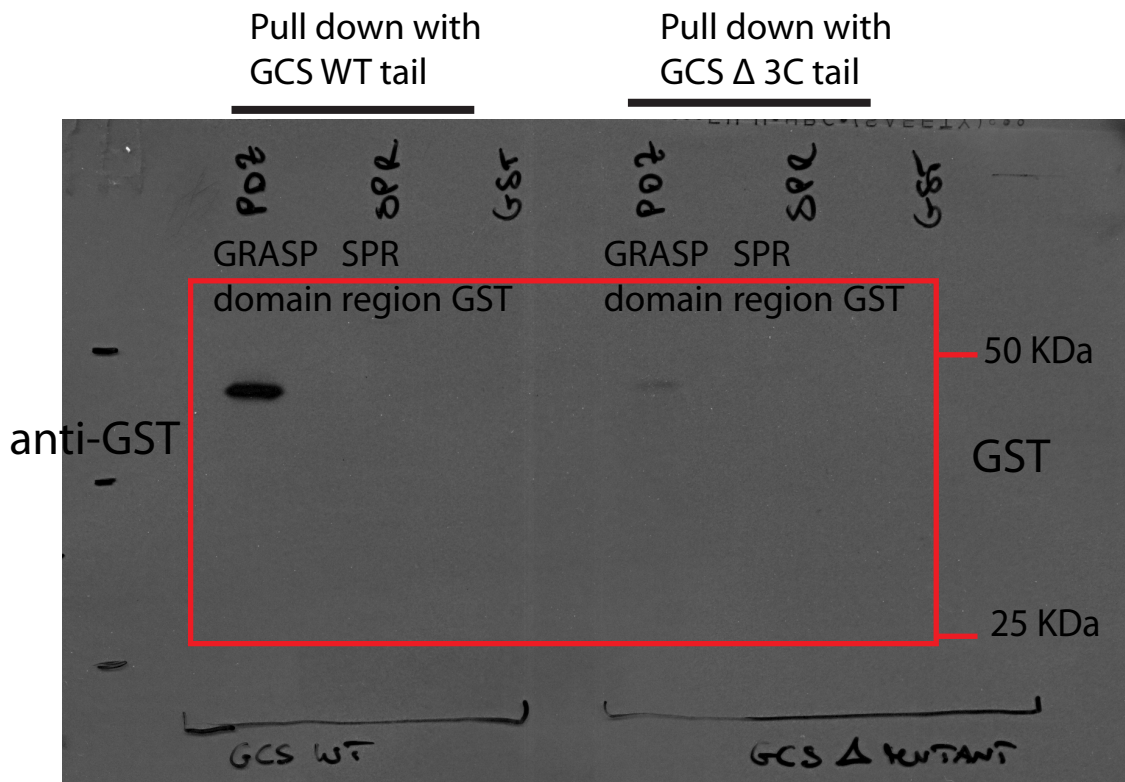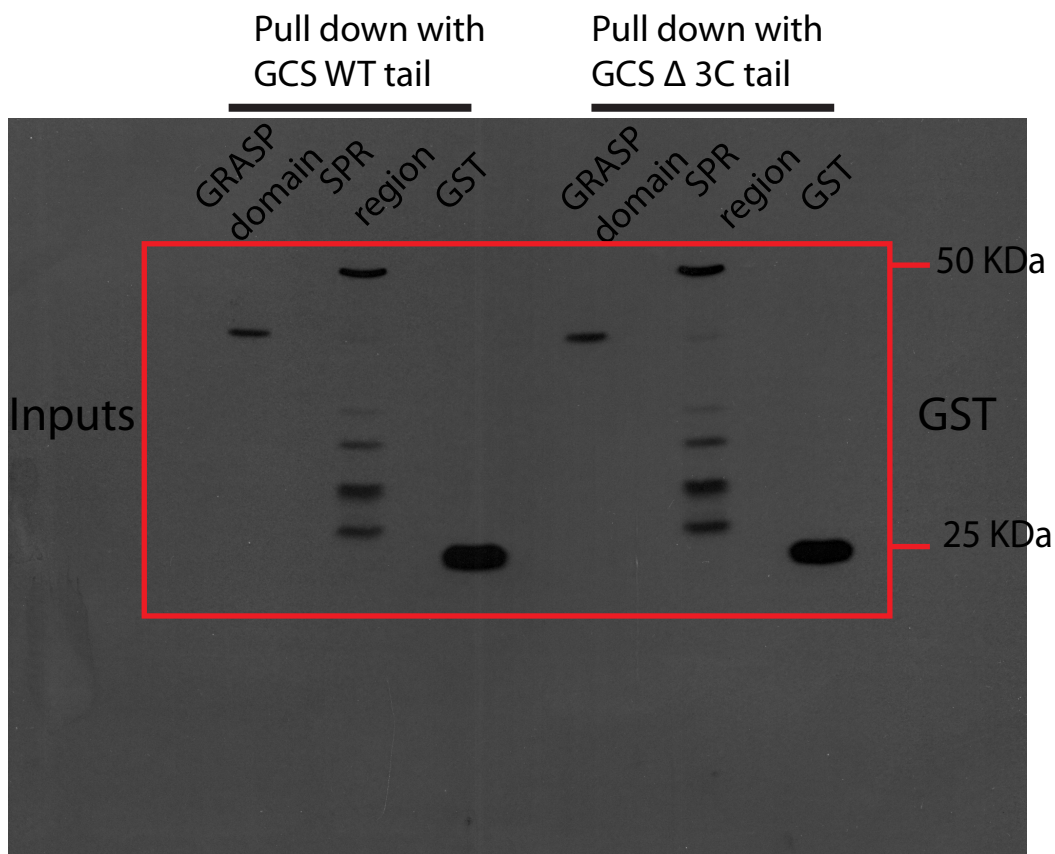



SOURCE DATA 4H

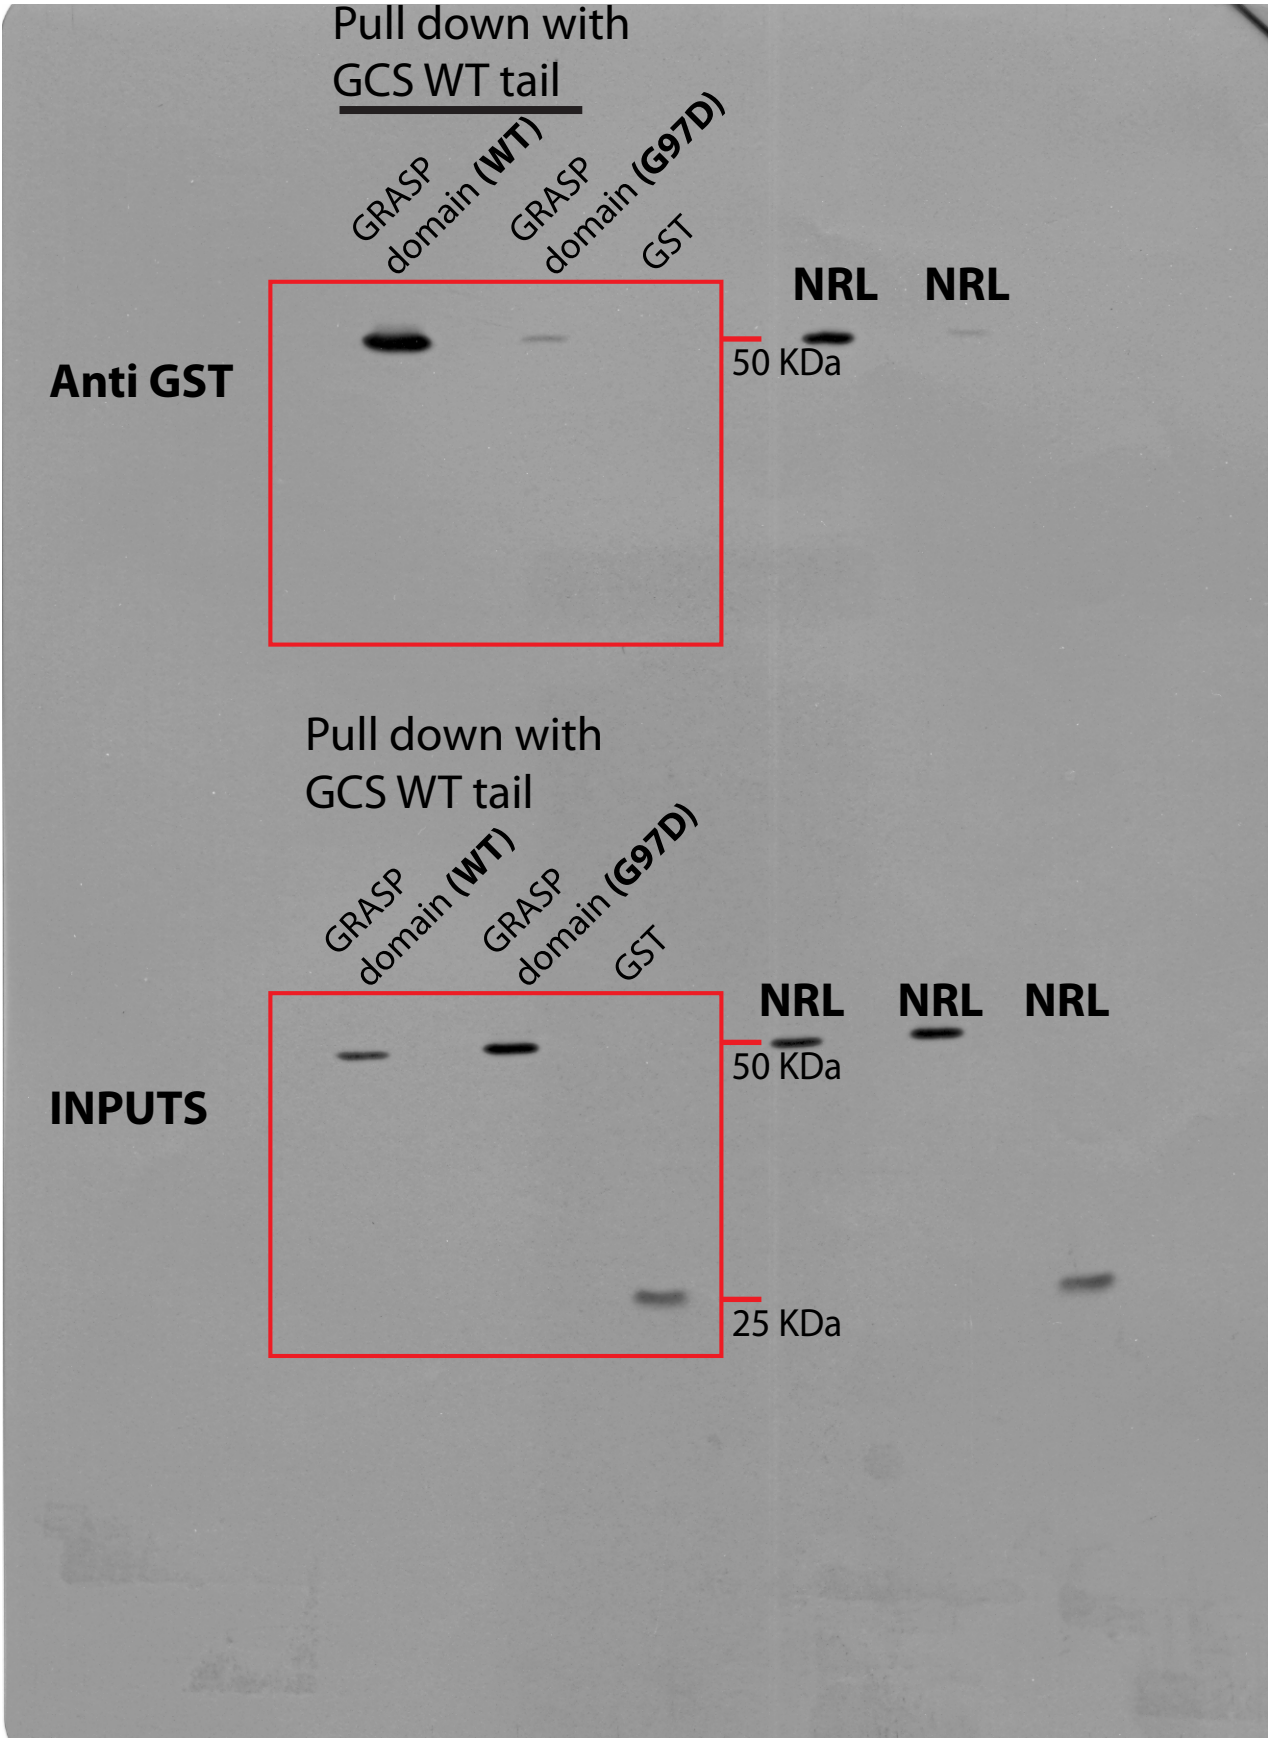

Supplement: EMBJ-40-e107766-s004.pdf [file EMBJ-40-e107766-s004.pdf]
