# Supplementary material for: GRASP55 regulates intra‐Golgi localization of glycosylation enzymes to control glycosphingolipid biosynthesis
Source: PubMed Central journal article supplement — EMBO J. 2021 Sep 13;40(20):e107766. doi: 10.15252/embj.2021107766 (PMC8521277; doi:10.15252/embj.2021107766), 2021-09-13
Supplement: EMBJ-40-e107766-s005.pdf [file EMBJ-40-e107766-s005.pdf]

1 Appendix Information:

2 Title: **GRASP55 regulates intra-Golgi localization of glycosylation enzymes to**  
3 **control glycosphingolipid biosynthesis**

4 **Table of Contents**

|    |                          |    |
|----|--------------------------|----|
| 5  | Appendix Figure S1.....  | 2  |
| 6  | Appendix Figure S2.....  | 4  |
| 7  | Appendix Figure S3.....  | 6  |
| 8  | Appendix Figure S4.....  | 8  |
| 9  | Appendix Figure S5.....  | 10 |
| 10 | Appendix Figure S6.....  | 12 |
| 11 | Appendix Figure S7.....  | 14 |
| 12 | Appendix Figure S8.....  | 16 |
| 13 | Appendix Figure S9.....  | 18 |
| 14 | Appendix Figure S10..... | 20 |
| 15 | Appendix Figure S11..... | 22 |
| 16 | Appendix Table S1.....   | 24 |
| 17 | Appendix Table S2.....   | 24 |
| 18 | Appendix Table S3.....   | 25 |
| 19 | Appendix Table S4.....   | 28 |
| 20 | Appendix Table S5.....   | 31 |
| 21 | Appendix Table S6.....   | 32 |
| 22 | Appendix Table S7.....   | 33 |
| 23 | Appendix Table S8.....   | 34 |

24

25

26

# Appendix Figure S1

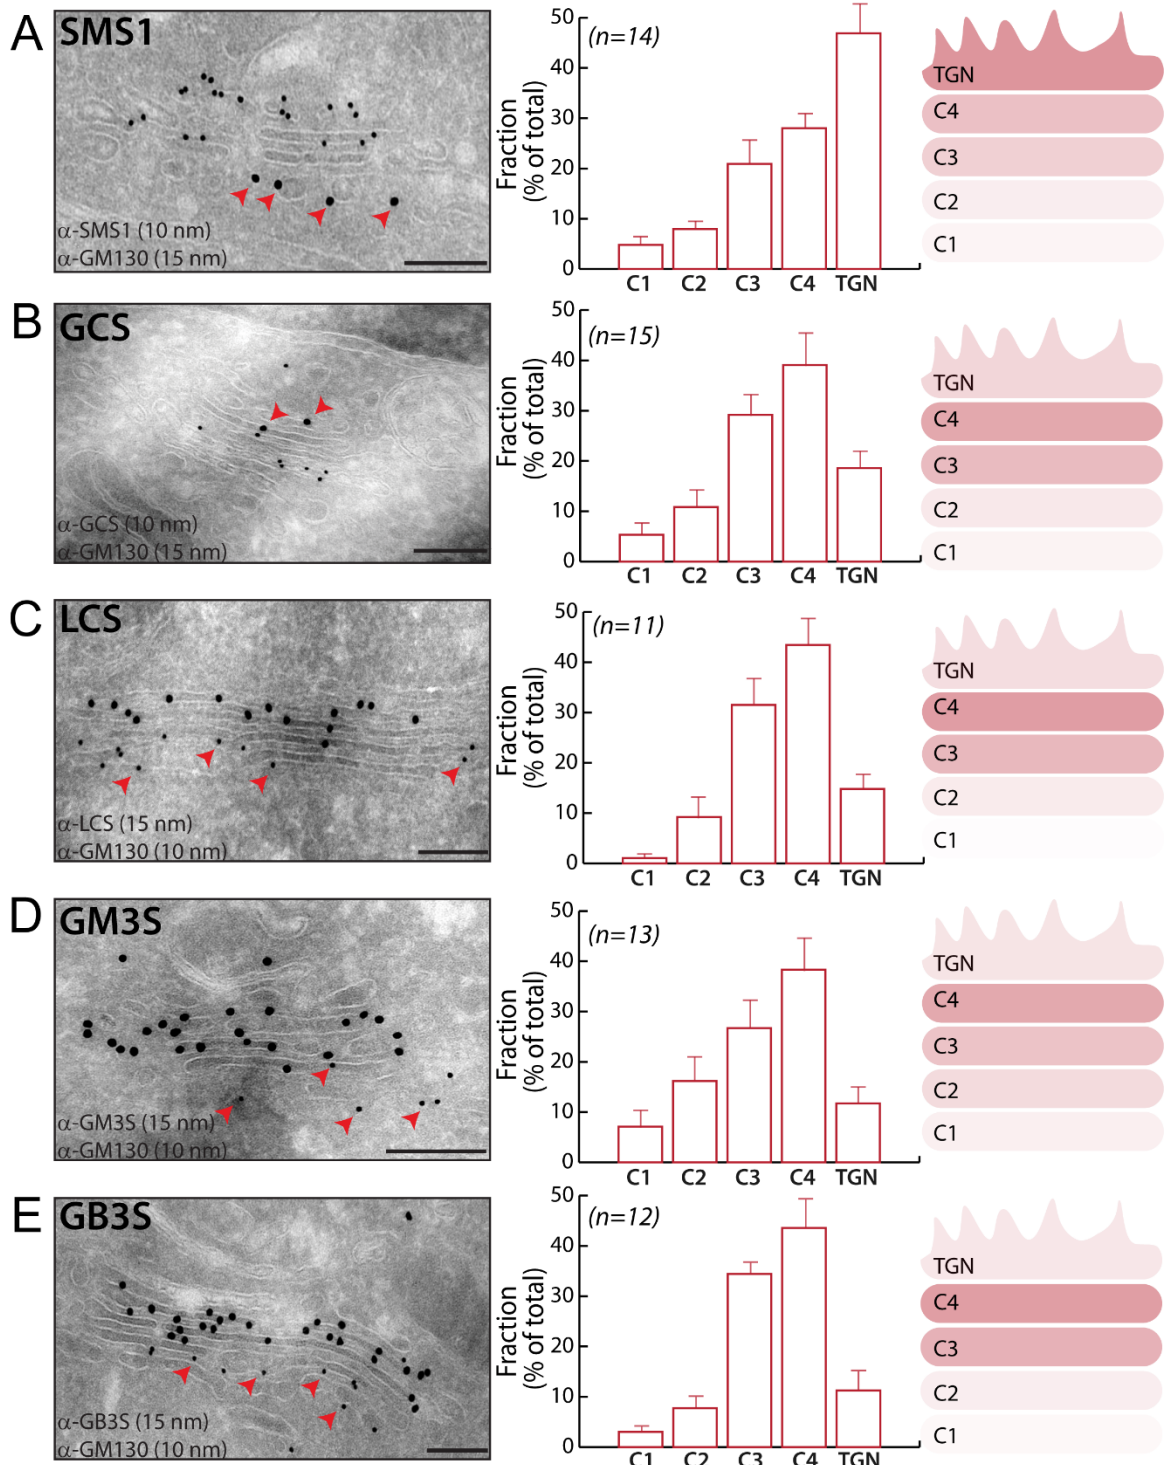

27

## 28 **Appendix Figure S1. Distribution of SL biosynthetic enzymes in Golgi:**

29 **(A-E)** HeLa cells were transfected with indicated HA-tagged SL biosynthetic enzymes  
 30 for 16 hours, fixed and processed for cryoimmunolabeling with anti-HA and anti-  
 31 GM130 antibodies followed by Protein A-gold. HA and GM 130 are represented by 10-

32 and 15-nm gold particles in case of SMS1 and GCS while in case of LCS, GB3S and  
33 GM3S they correspond to 15- and 10-nm gold particles respectively. Red arrow heads  
34 indicate cis face of Golgi marked by GM130 labelling. Enzyme distribution expressed  
35 as fraction of total gold particles per Golgi stack including TGN. (n indicated in the  
36 graph); data are mean  $\pm$  SEM, Scale Bar, 200nm.

37

# Appendix Figure S2

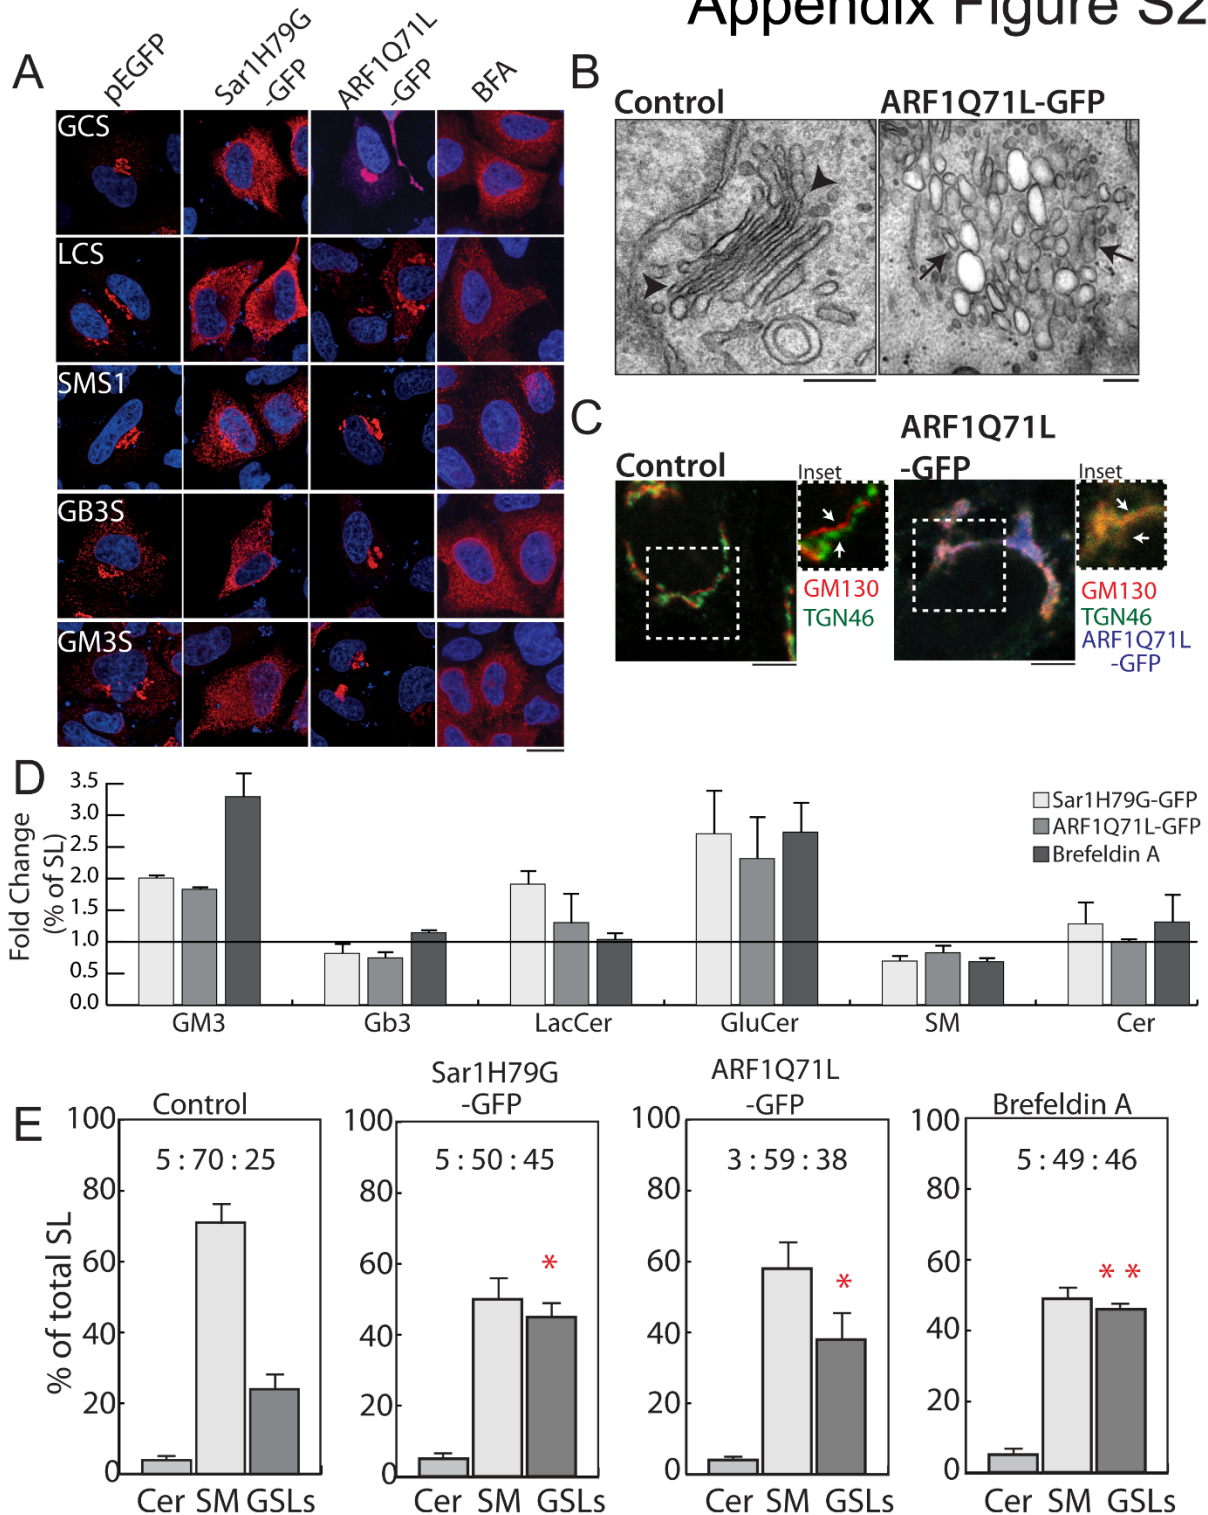

38

39 **Appendix Figure S2. Golgi organization determines faithful SL output:**

40 (A) HeLa cells were transfected with indicated HA-tagged SL biosynthetic enzymes  
 41 and either empty vector (PEGFP) or a plasmid encoding Sar1H79G-GFP or  
 42 ARF1Q71L-GFP for 16 hours or treated with brefeldin A (BFA) (5 $\mu$ g/ml) for 30 min,



43 fixed, permeabilized and stained with DAPI (blue) and anti-HA antibody (red). Scale  
44 bar, 10  $\mu$ m.

45 **(B)** HeLa cells transfected with PEGFP or ARF1Q71L-GFP for 16 hours were fixed  
46 and processed for electron microscopy. Black arrow heads indicate the intact Golgi  
47 and black arrows represent the tubulo-vesicular clusters. Scale Bar, 200nm.

48 **(C)** HeLa cells were transfected with ARF1Q71L-GFP for 16 hours, fixed,  
49 permeabilized and stained with anti-GM130 and anti-TGN46 antibodies. GM130 is  
50 represented in red, TGN46 in green, and GFP in blue. White arrows indicate the  
51 separation of cis and trans markers of the Golgi in control cells and their overlap in  
52 ARF1Q71L-GFP expressing cells. Scale bar, 10  $\mu$ m.

53 **(D-E)** SL species quantified by radioactive pulse chase assay in HeLa cells transfected  
54 with Sar1H79G-GFP or ARF1Q71L-GFP or treated with BFA and represented as fold  
55 change with respect to control **(D)** or as relative percentage of Cer, SM and GSLs **(E)**.  
56 For BFA treated cells, the SL output was measured 8h after a pulse. Data represented  
57 as mean  $\pm$  SD of 2 independent experiments. \* $P$ < 0.05, \*\* $P$ <0.01 (Student's t test).

58

# Appendix Figure S3

A

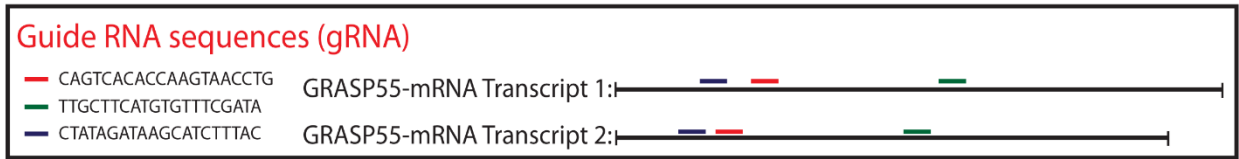

B

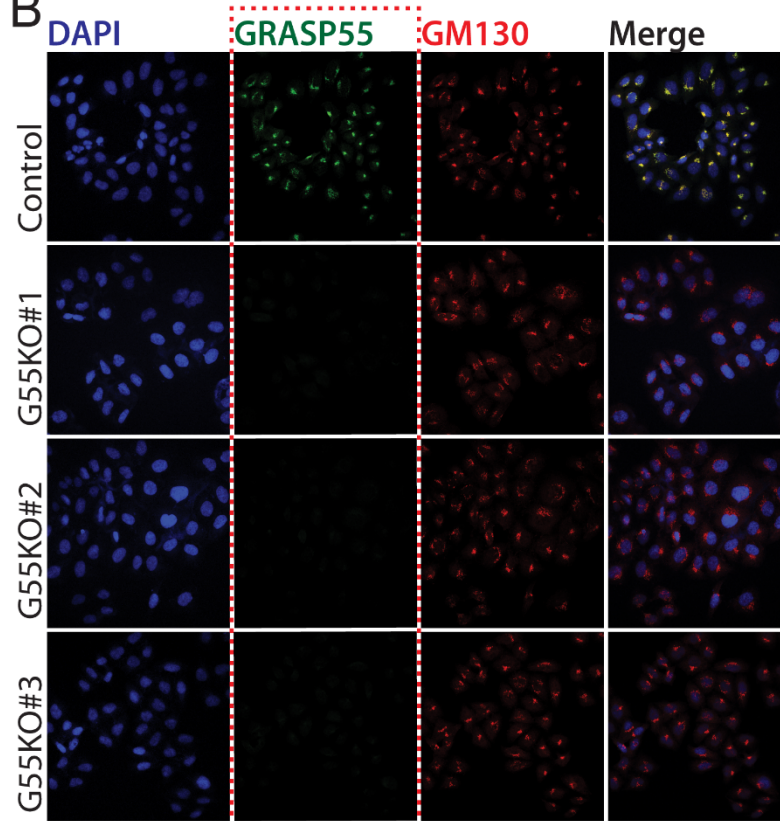

C

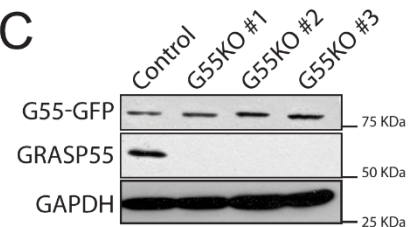

D

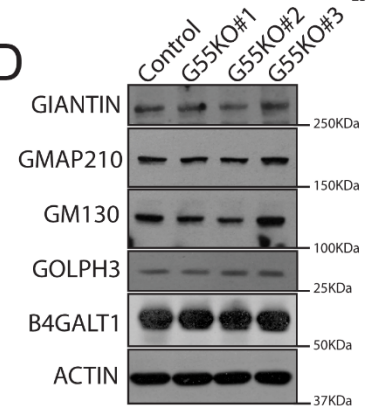

E

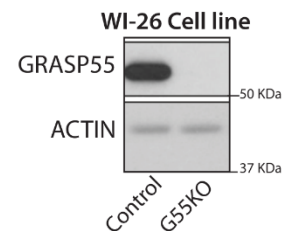

59

60 **Appendix Figure S3. Generation of GRASP55KO cell lines:**

61

62 **(A)** Specific guide RNA oligonucleotides for human GRASP55 gRNA #1, #2 and #3  
 63 used for CRISPR/Cas9-mediated deletion of GRASP55 expression. The sequences  
 64 of oligonucleotides are shown and the sites in GRASP55 transcripts to which the  
 65 gRNA correspond are indicated.

66

67 **(B)** The control and GRASP55 KO clones were fixed, permeabilized and stained with  
 68 DAPI (blue), anti-GM130 antibody (red) and anti-GRASP55 antibody (green). Scale  
 69 bar, 10  $\mu$ m.

69

70 **(C)** Control and GRASP55 KO clones transfected with GRASP55-GFP were analysed  
 by Western blotting with anti-GRASP55 and anti-GFP antibody.

71 **(D)** Cell lysates from control and GRASP55 KO clones were analysed for the  
72 expression of indicated Golgi-Matrix proteins by western blotting.

73 **(E)** Cell lysates of wild type and GRASP55 KO fibroblasts were analysed by western  
74 blotting for GRASP55 expression.

75

# Appendix Figure S4

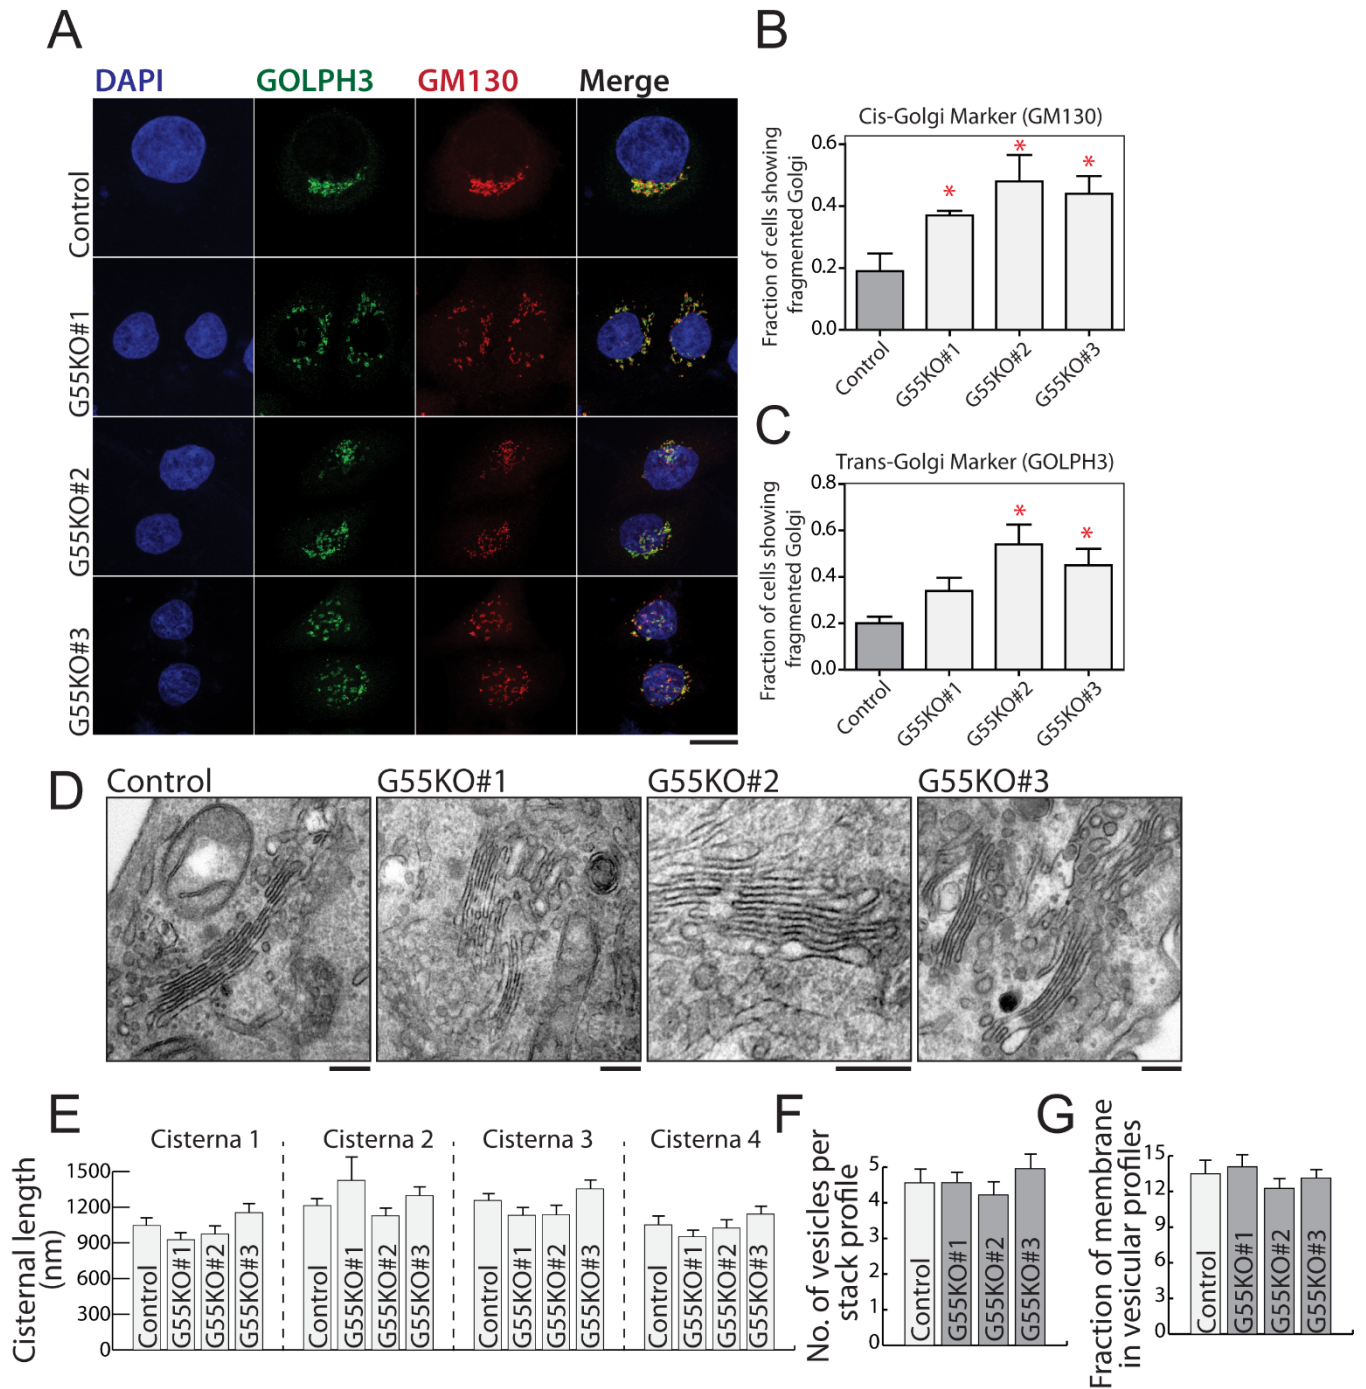

76

77 **Appendix Figure S4. Characterization of Grasp55 KO clones:**

78 (A) Control and GRASP55 KO clones were fixed, permeabilized and stained with DAPI  
 79 (blue), anti-GM130 antibody (red) and anti-GOLPH3 antibody (green). The images  
 80 represent the maximum intensity projection along the z-axis of 7 consecutive confocal  
 81 sections. Scale bar, 10  $\mu$ m.

82 **(B-C)** The graphs represent the fraction of cells displaying fragmented Golgi in control  
83 and GRASP55 KO clones. Values are mean  $\pm$  SD of 2 independent experiments. \*p  
84 <0.05 (Student's t test).

85 **(D)** Control and GRASP55 KO cells were fixed and prepared for EM. The Golgi profile  
86 shown suggests no significant alterations in the stack architecture of Golgi. Scale bar  
87 corresponds to 200nm.

88 **(E-G)** Control and GRASP55 KO micrographs were subjected for morphological  
89 evaluation of the Golgi stacks. (E) Quantification of the length of cisternae of Golgi  
90 stacks in control and GRASP55 KO clones. (F-G) The number of vesicles associated  
91 with Golgi stacks and fraction of membrane in vesicular profiles were quantified and  
92 represented. All the EM micrographs, E-G, at least 30 Golgi stacks across three  
93 biological replicates were quantified. Error bars represent the SEM.

94

# Appendix Figure S5

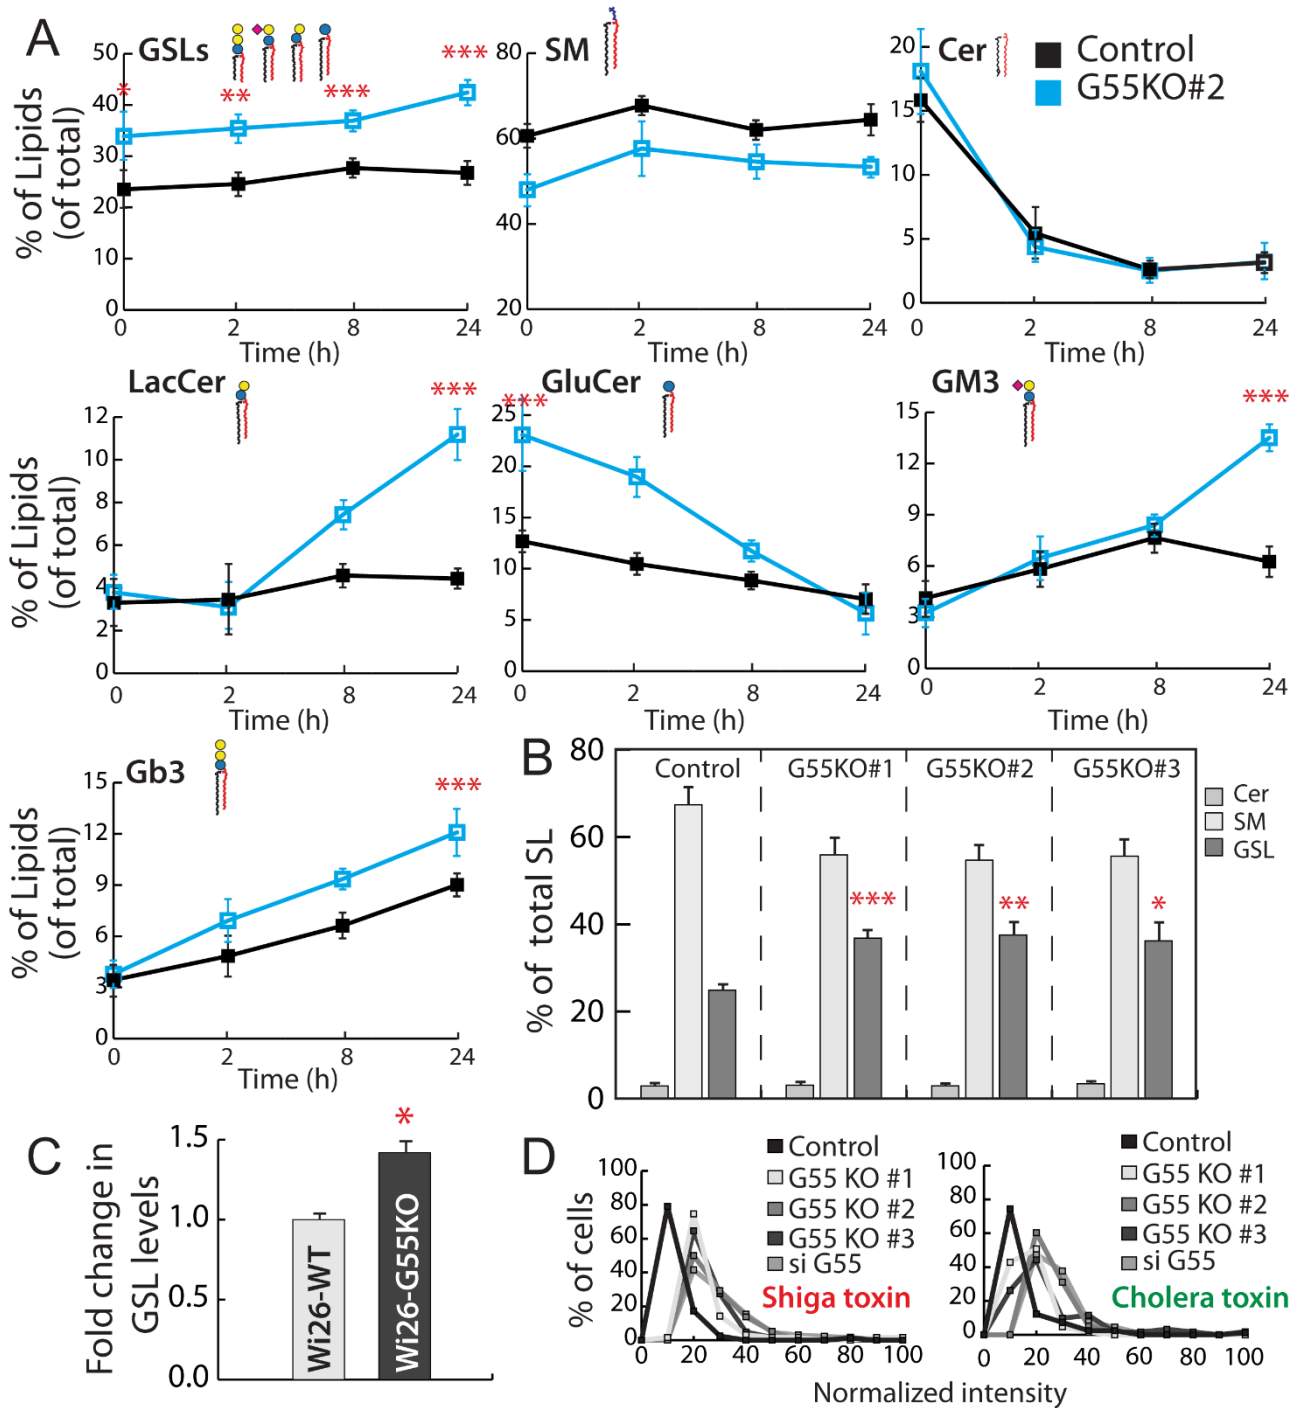

95

96 **Appendix Figure S5. GRASP55 regulates GSL biosynthesis:**

97 **(A)** Control and GRASP55 KO (#2) cells were subjected to radioactive pulse chase  
 98 assay as described earlier, the indicated SL species were quantified and are  
 99 represented as percentage of total SLs. X-axis represents chase time. Data



100 represented as mean  $\pm$  SD of 3 independent experiments. \*p <0.05, \*\*p <0.01, \*\*\*p  
101 <0.001 (Student's t test).

102 **(B)** Control and GRASP55 KO cells were subjected to radioactive pulse chase assay  
103 as described earlier. SL levels were quantified after 24h of chase and represented as  
104 percentage of total SLs. Data represented as mean  $\pm$  SD of 3 independent  
105 experiments. Data represented as mean  $\pm$  SD of 2 independent experiments. \*p <0.05,  
106 \*\*p <0.01, \*\*\*p <0.001 (Student's t test).

107 **(C)** SL production in control or GRASP55 KO fibroblasts was measured by [<sup>3</sup>H] -  
108 sphingosine pulse-chase assay, and total GSL levels are expressed as fold changes  
109 with respect to control. Data represented as mean  $\pm$  SD of 2 independent experiments.  
110 \*p <0.05 (Student's t test).

111 **(D)** Effect of GRASP55 depletion on GSL levels measured by Cy3-conjugated ShTxB  
112 (Shiga Toxin) and Alexa488-conjugated ChTxB (Cholera Toxin) staining in control and  
113 GRASP 55 KO cells or cells treated with GRASP55 siRNA. The cells were imaged by  
114 epifluorescence microscopy and intensity of the fluorescence staining quantitated.  
115 Frequency distribution of level of STxB and CTxB staining is represented with  
116 intensities normalized to maximum intensity for each condition (>100 cells per  
117 condition were analysed).

118

# Appendix Figure S6

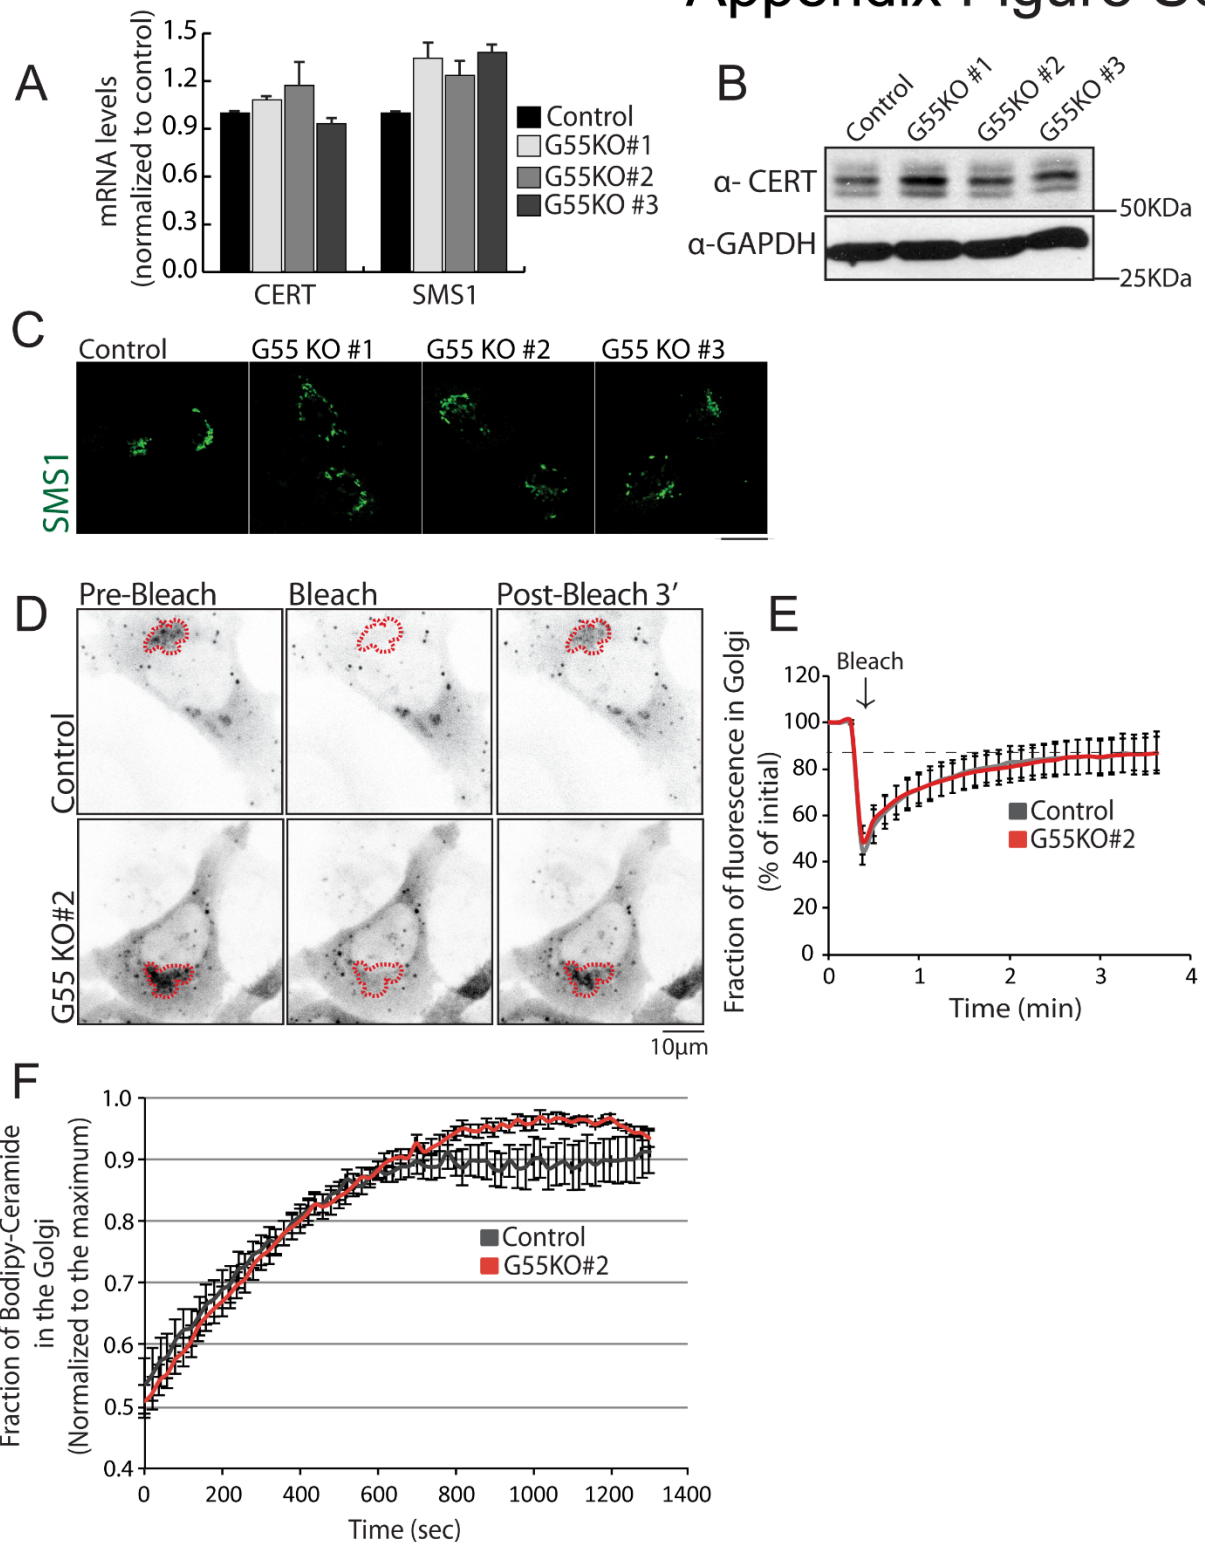

119 **Appendix Figure S6. GRASP55 does not regulate SM biosynthetic arm of SL**

120 **biosynthetic pathway:**

121 **(A)** The mRNA levels of CERT and SMS1 were evaluated by qRT-PCR (values are  
 122 mean  $\pm$  SD; n=3).

123 **(B)** Control and GRASP55 KO cell protein lysates were analysed by western blotting  
124 for CERT expression.

125 **(C)** Control and GRASP55 KO cells expressing SMS1-HA were fixed, and processed  
126 for immunofluorescence with anti-HA antibody (green). Scale Bar, 10  $\mu$ m.

127 **(D-E)** Control cells and GRASP55 KO (#2) cells were transfected with CERT-GFP for  
128 16 hours, the area of Golgi indicated by the red dotted line was bleached and the  
129 recovery of fluorescence was observed by live epifluorescence imaging.  
130 Representative images of indicated times are shown **(D)**. The ratio of fluorescence of  
131 the bleached area to an adjacent unbleached area was measured for each time point,  
132 normalized to initial values and plotted in the indicated graph **(E)**. Scale bar, 10  $\mu$ m.

133 **(F)** Kinetics of Ceramide transport to Golgi was studied using BODIPY labelled-C6  
134 ceramide in GRASP55 KO cells. Cells were labelled with BODIPY C6 ceramide (10  
135  $\mu$ M) for 30 min at 4°C. The cells were then washed and shifted to 37°C in the  
136 microscope and analysed by epifluorescence microscopy. The perinuclear  
137 concentration of fluorescence signal was quantified and plotted.

138

# Appendix Figure S7

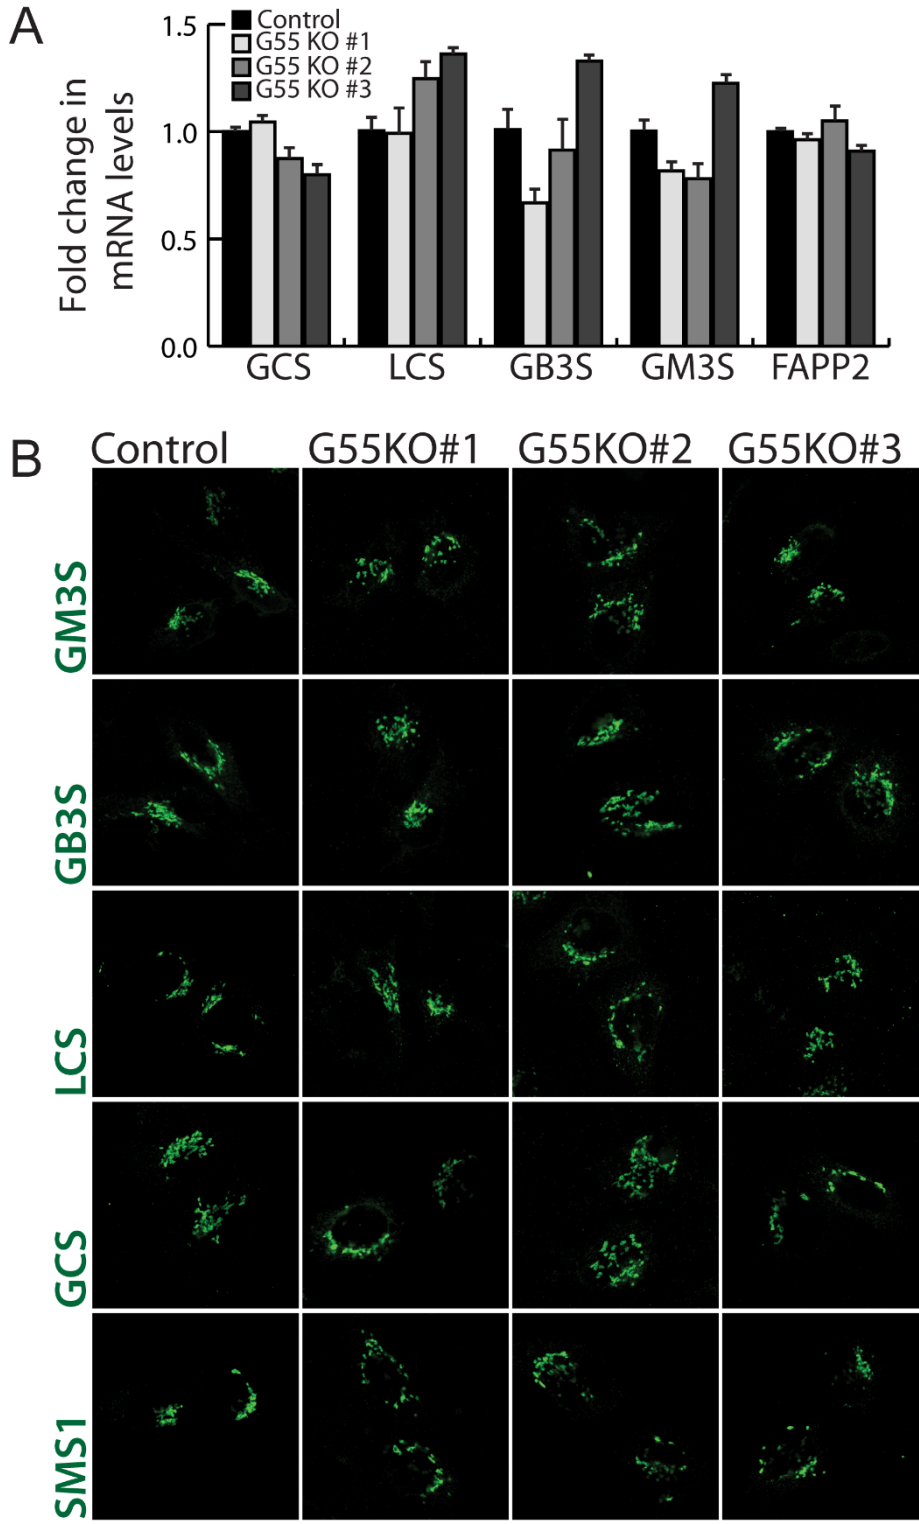

139

140 Appendix Figure S7. GRASP55 does not regulate the levels or cellular

141 localization of GSL biosynthetic enzymes:

142 **(A)** Expression of GSL biosynthetic enzymes in control and GRASP55 KO clones were  
143 analysed by qRT-PCR. Values are mean  $\pm$  SD; n=3

144 **(B)** Control and GRASP55 KO clones were transfected with the indicated HA-tagged  
145 GSL biosynthetic enzymes for 16 hours, fixed, permeabilized and stained with anti-HA  
146 antibody (Green). Scale bar, 10  $\mu$ m. Note the image corresponding to SMS1 is the  
147 same as in **Fig.S6C**.

148

# Appendix Figure S8

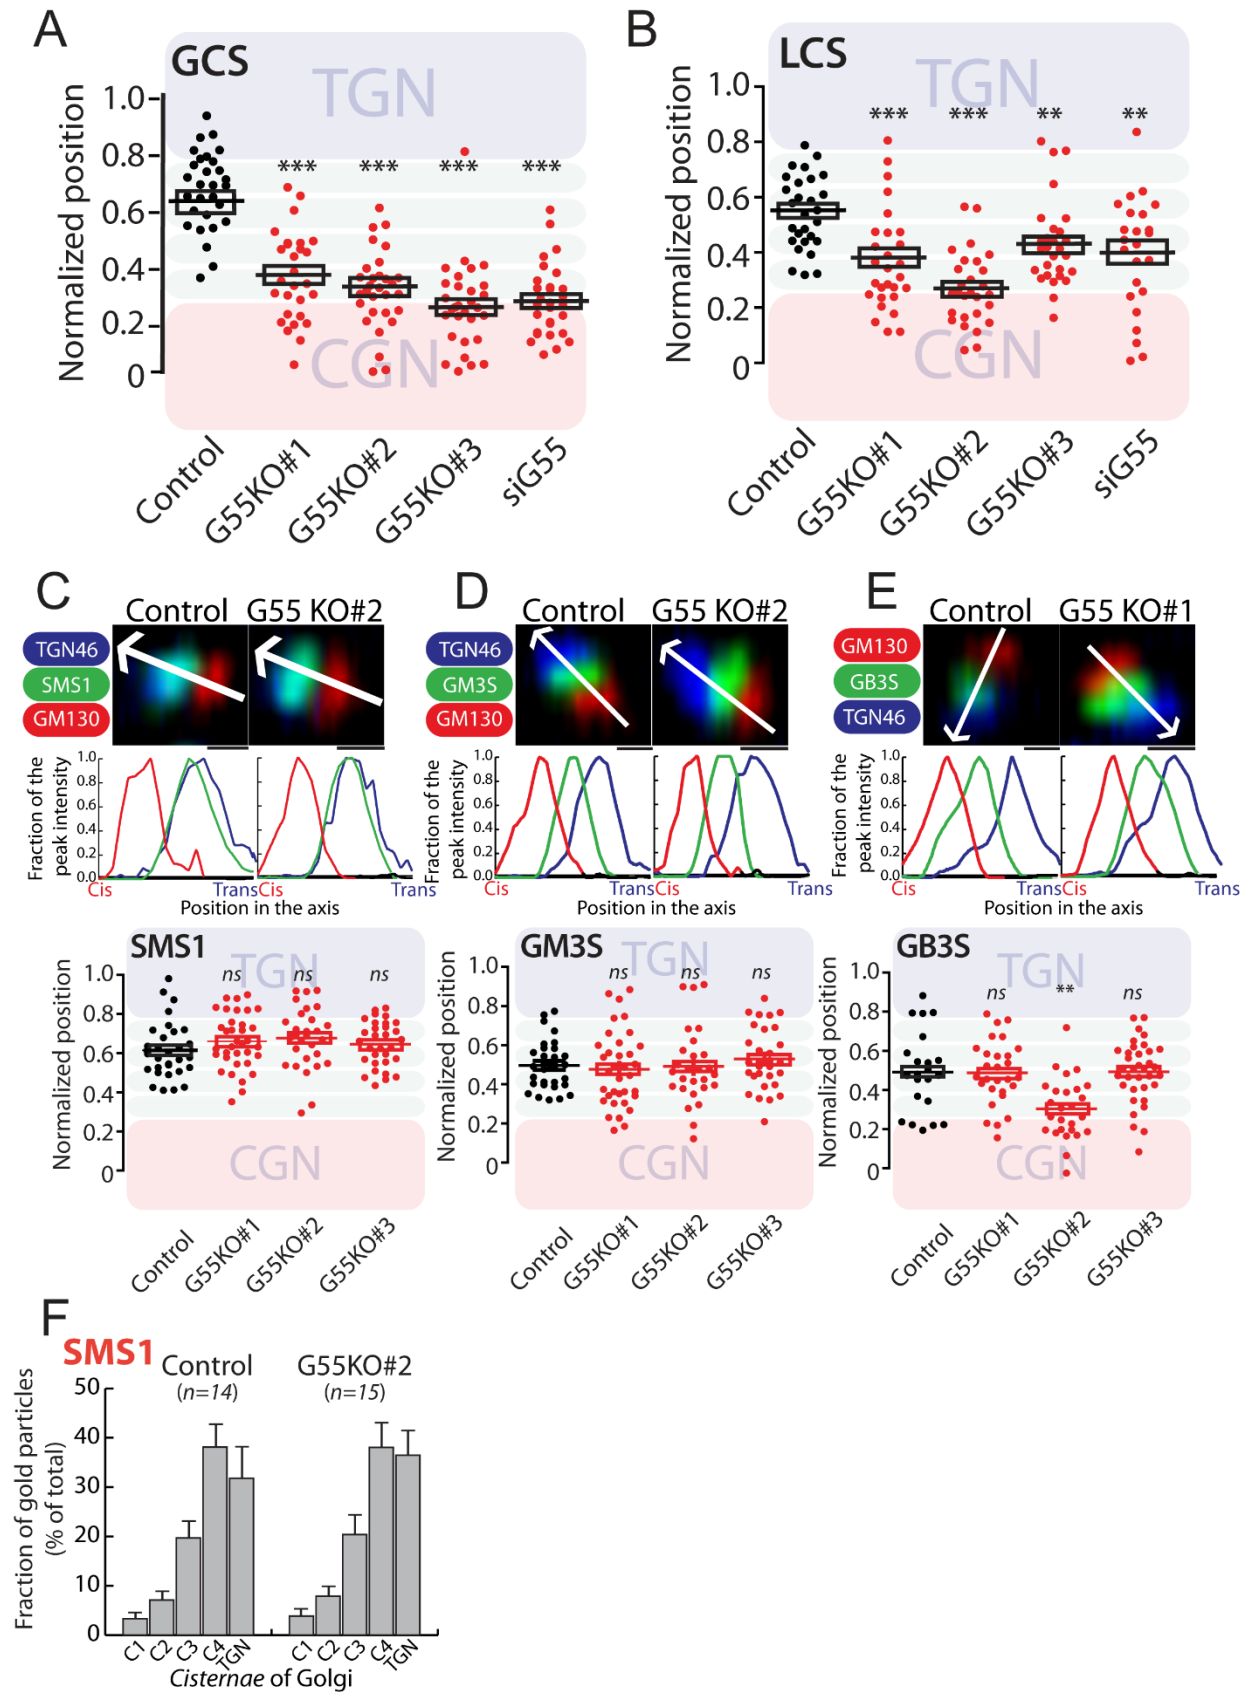



150 **Appendix Figure S8. GRASP55 regulates intra-Golgi localization of GCS and**

151 **LCS:**

152 **(A-E)** Control cells treated with or without GRASP55 siRNA and GRASP55 KO clones  
153 were transfected with HA-tagged GSL biosynthetic enzymes, treated with nocodazole  
154 (33  $\mu$ M) for 3 hours, and processed for immunofluorescence with anti-HA, anti-GM130,  
155 and anti-TGN46 antibodies. The relative position of HA-tagged enzymes with respect  
156 to GM130 and TGN46 was measured by line scanning and expressed as normalized  
157 positions of the peak intensity with peak of GM130 set to 0 and that of TGN46 to 1.  
158 The images are representative of >30 stacks analysed for each condition from 3  
159 independent experiments. The data are mean  $\pm$  SD (n=30) representative of 3  
160 experiments. \*\*p <0.01, \*\*\*p <0.001(Student's t test) and *ns* signifies not statistically  
161 significant.

162 **(F)** Control and GRASP55 KO cells were transfected for 16 hours with SMS1-HA and  
163 processed for cryoimmunolabeling. Distribution of indicated enzymes across the Golgi  
164 stack was quantified and represented as fraction of Gold particles in each cisterna (n  
165 indicated in the graph; data are Mean  $\pm$  SEM).

166

# Appendix Figure S9

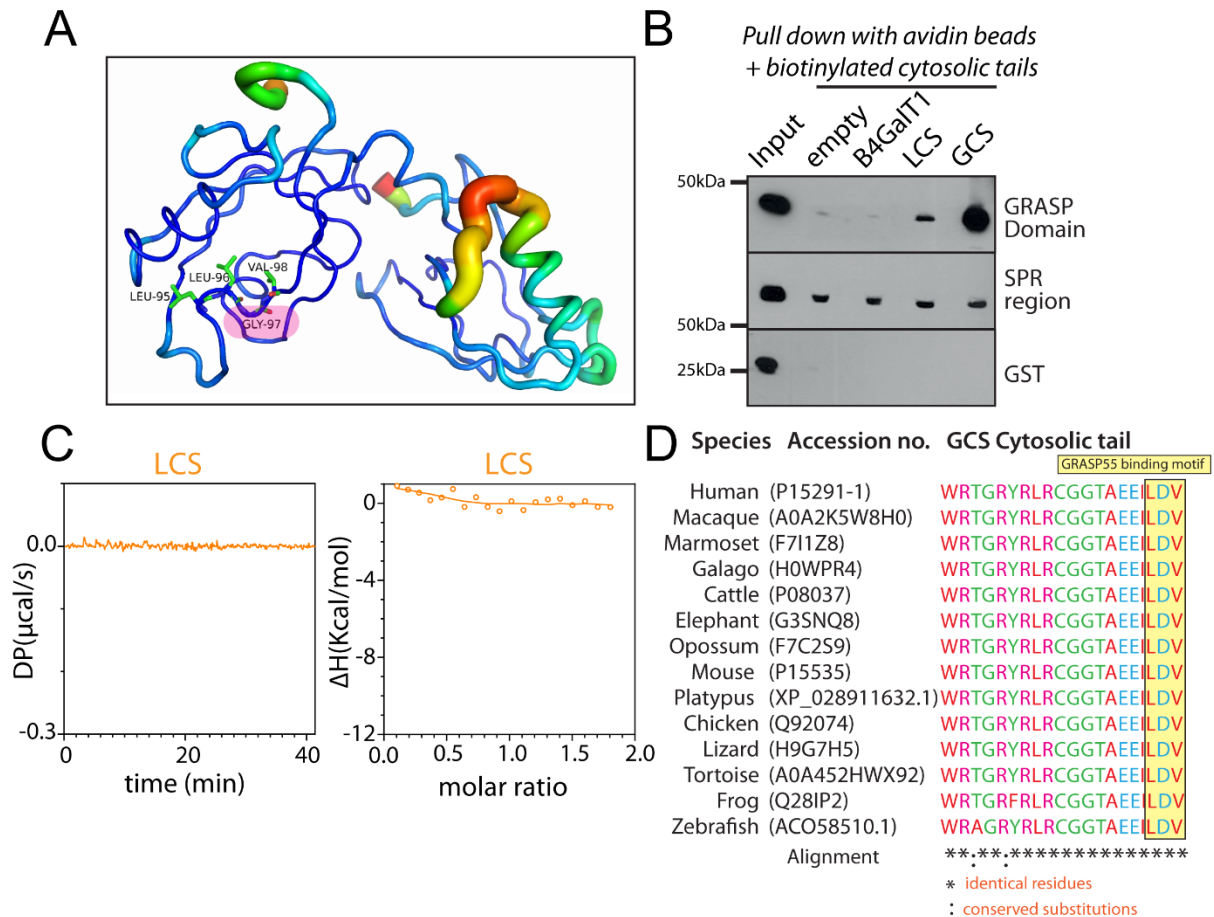

167

## 168 Appendix Figure S9. GRASP55 directly interacts with GCS and LCS to promote 169 their sub-Golgi localization:

170 (A) B-factor analysis of the high-resolution crystal structure of complex  
171 GRASP55:Golgin45, revealed that the cognate carboxylate binding motif is rigid in  
172 nature. Glycine is more favoured such a 'strained conformation' (left handed alpha  
173 helical), where the loop is rigid. Asp is not a favoured residue to be in left-handed  $\alpha$   
174 helical conformation. It can be predicted, in the absence of mutant crystal structure,  
175 that there has been reorientation in the backbone conformation, which may have led  
176 to the disruption of the characteristic hydrogen bond network between the protein and  
177 peptide.

178 (B) Chemically synthesized biotinylated peptides corresponding to cytosolic portions  
179 of glycosylation enzymes and indicated purified GST-tagged GRASP domain or SPR  
180 region of GRASP55 were incubated together and their interaction was monitored by

181 pulling down the biotinylated peptides with avidin beads followed by western blotting  
182 with anti-GST tag antibody.

183 **(C)** ITC profile, representative of at least 3 independent experiments, for biotinylated  
184 LCS cytosolic tails with recombinant GRASP55.

185 **(D)** The last 20 amino acids of the cytoplasmic tail of GCS orthologs from indicated  
186 species of jawed vertebrates were retrieved from UniProt (accession numbers  
187 indicated in bracket). The alignment of the sequences was done using the web version  
188 of the Clustal Omega software (Madeira, Park et al., 2019) at  
189 <http://www.ebi.ac.uk/Tools/msa/clustalo>. GRASP55 binding motif is highlighted in  
190 yellow.

191

# Appendix Figure S10

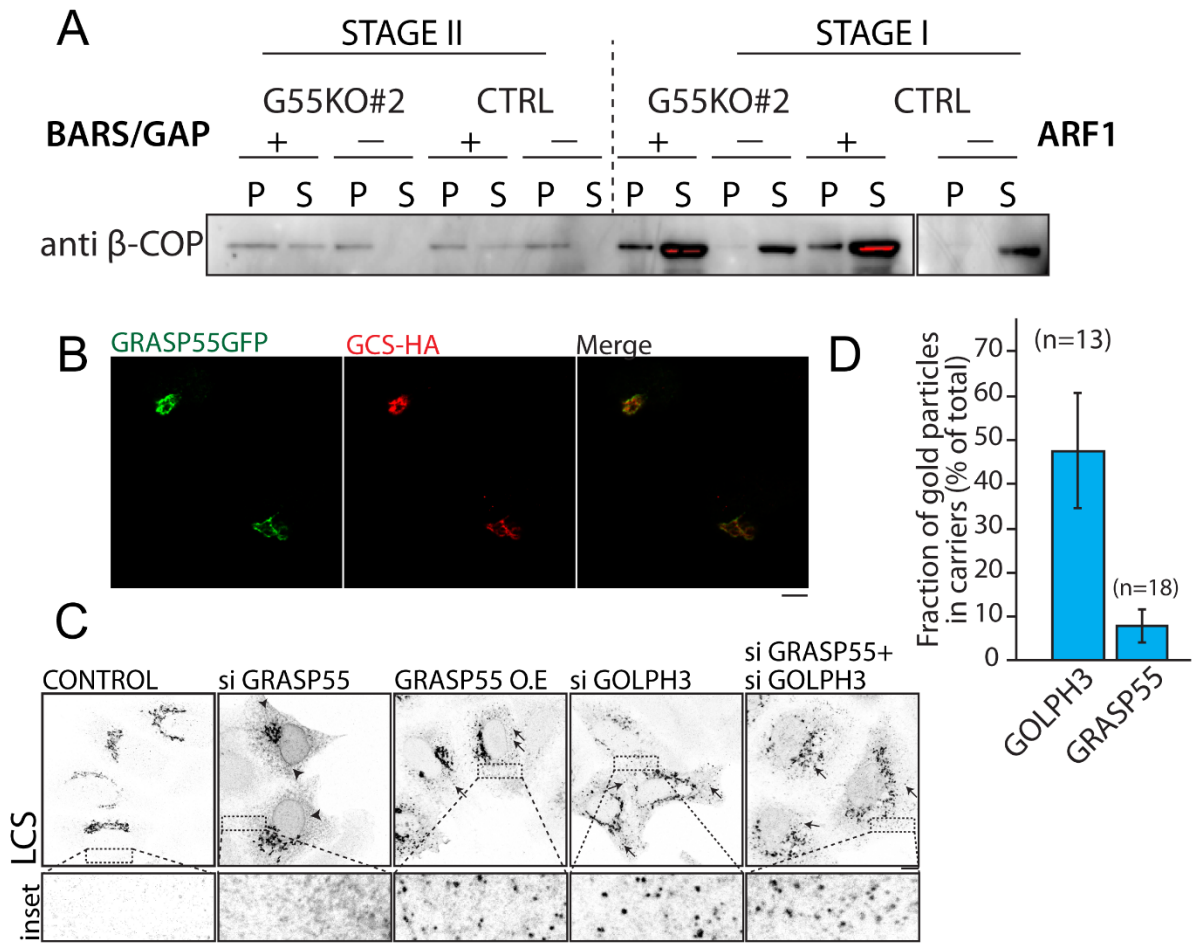

192

193 **Appendix Figure S10. GRASP55 compartmentalizes the enzymes by preventing**  
 194 **their entry into retrograde carriers:**

195 **(A)** The two-stage incubation system was performed to reconstitute COPI vesicles.  
 196 The first-stage incubation results in the ARF1-dependent recruitment of coatamer to  
 197 Golgi membrane, as reflected by  $\beta$ -COP being redistribution from the supernatant  
 198 (soluble) fraction to the pellet (Golgi membrane) fraction. The second-stage  
 199 incubation results in the generation of COPI vesicles from Golgi membrane, as  
 200 reflected by  $\beta$ -COP being redistributed from the pellet (Golgi membrane) fraction to  
 201 the supernatant (vesicular membrane) fraction.

202 **(B)** HeLa cells co-transfected with GCS-HA and GRASP55-GFP tagged constructs  
 203 were fixed, permeabilized and stained with anti-HA antibody (Green) Scale bar, 10 $\mu$ m.

204 **(C)** HeLa cells treated with indicated siRNAs and transfected with LCS-HA or co-  
205 transfected with GRASP55-GFP and LCS-HA were fixed, permeabilized and stained  
206 for LCS-HA (indicated in black). Spots of LCS-HA marked by black arrows and inset  
207 (shown below) indicate possible post-Golgi compartments. Scale bar, 10 $\mu$ m.

208 **(D)** HeLa cells were fixed and processed for cryoimmunolabeling with an anti-  
209 GRASP55 antibody and anti-GOLPH3 antibody. Quantification of the distribution (LD  
210 normalised to the Golgi stack) of GRASP55 and GOLPH3 in peri-Golgi vesicles  
211 (carriers) is shown in the graph data are means  $\pm$  SEM.

212

# Appendix Figure S11

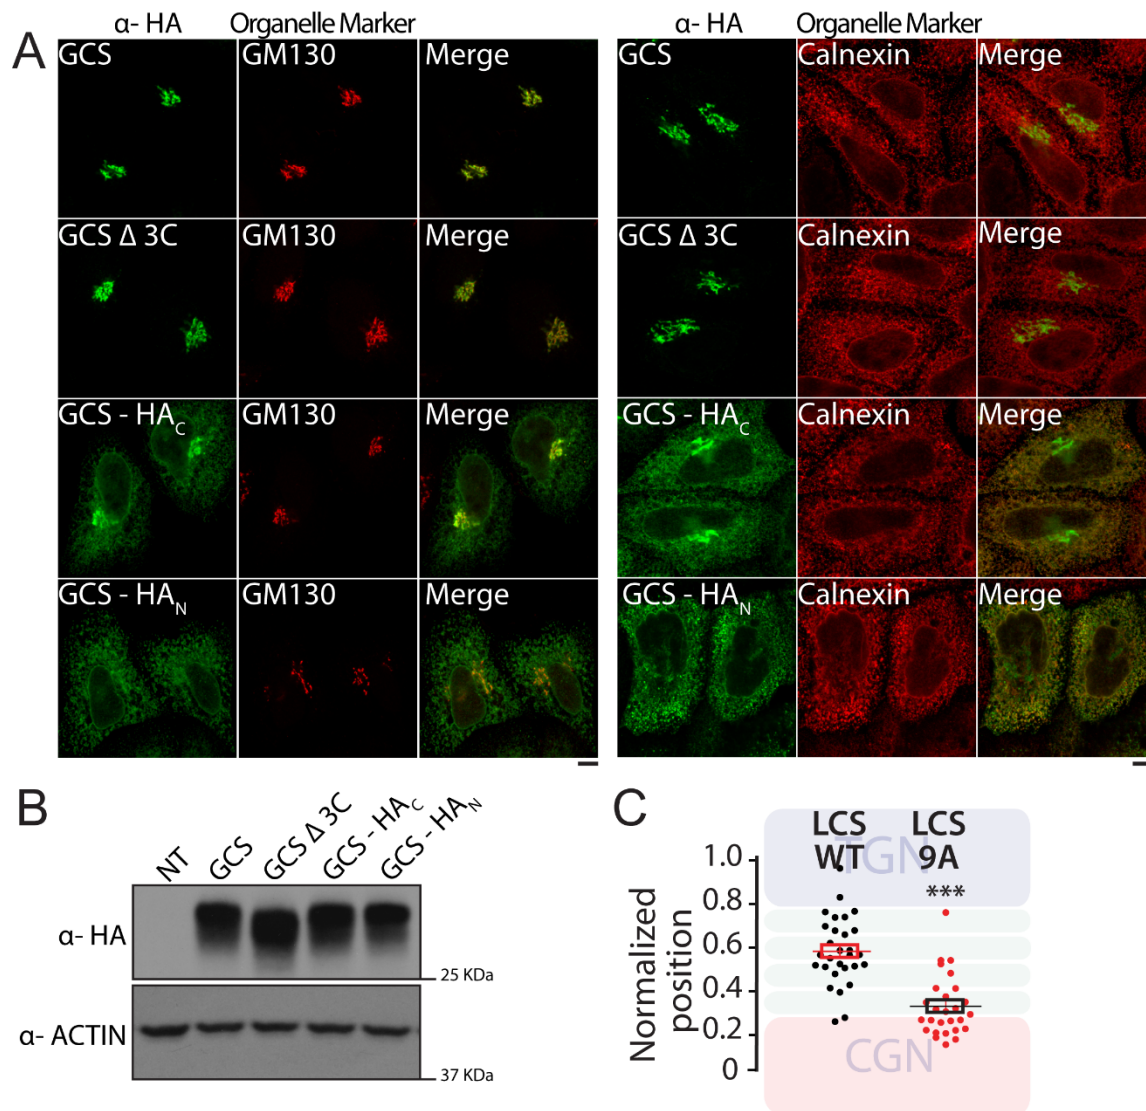

213

214 **Appendix Figure S11. Localization of GCS WT and mutants, sub-Golgi**  
 215 **localization of LCS WT and mutant:**

216 **(A)** HeLa cells transfected with indicated GCS constructs were fixed, permeabilized  
 217 and stained with anti-HA antibody (Green) and indicated organelle markers (red).  
 218 Scale bar, 10µm.

219 **(B)** HeLa cells transfected with indicated GCS constructs and protein lysates were  
 220 analysed by western blotting for expression of indicated constructs.

221 **(C)** HeLa cells were transfected with either WT LCS, or LCS9A, treated with  
 222 nocodazole (33 µM) for 3 hours and labelled for enzymes, GM130, and TGN46. Line



223 scan analysis was performed as in Fig.3A-B and the relative position of enzymes was  
224 quantitated and plotted. The data are mean  $\pm$  SD (n=30) representative of 2  
225 experiments. \*\*p <0.01, \*\*\*p <0.001(Student's t test) and *ns* signifies not statistically  
226 significant.

227

228

229 **Appendix Tables**

230 **Appendix Table S1** gRNAs used in this study to generate GRASP55 knockout cell

| <b>gRNA</b>  | <b>Sequence</b>      |                               |                  |
|--------------|----------------------|-------------------------------|------------------|
| #1 GUIDE RNA | CAGTCACACCAAGTAACCTG | Santa Cruz Biotechnology, Inc | Cat # SC-401106; |
| #2 GUIDE RNA | TTGCTTCATGTGTTTCGATA | Santa Cruz Biotechnology, Inc | Cat # SC-401106  |
| #3 GUIDE RNA | CTATAGATAAGCATCTTTAC | Santa Cruz Biotechnology, Inc | Cat # SC-401106  |

231 lines.

232

233 **Appendix Table S2** List of recombinant DNA used in this study

| <b>Recombinant DNA</b>                         | <b>Source</b>                       |              |
|------------------------------------------------|-------------------------------------|--------------|
| GRASP55-EGFP                                   | Kind gift from Yanzhuang Wang       | N/A          |
| GB3S                                           | Kind gift from Antonella De Matteis | N/A          |
| GM3S                                           | Kind gift from Antonella De Matteis | N/A          |
| LCS                                            | Kind gift from Antonella De Matteis | N/A          |
| GCS-HA <sub>c</sub>                            | Kind gift from Giovanni D'angelo    | N/A          |
| SMS1                                           | Kind gift from Giovanni D'angelo    | N/A          |
| CERT                                           | Kind gift from Antonella De Matteis | N/A          |
| PEGFP                                          | Addgene                             | Cat # 6085-1 |
| Sar1-GTP                                       | Kind gift from Rainer Pepperkok     | N/A          |
| ARF1-GTP                                       | Kind gift from Antonella De Matteis | N/A          |
| Str-KDEL_B4GALT5-SBP-EGFP (referred as LCS WT) | This study.                         | N/A          |

|                                                   |                                          |     |
|---------------------------------------------------|------------------------------------------|-----|
| Str-KDEL_B4GALT5-SBP-EGFP (referred as and LCS9A) | This study.                              | N/A |
| GCS-HA <sub>N</sub>                               | This Study (custom made from genescript) | N/A |
| GCS                                               | This Study                               | N/A |
| GCS Δ3C                                           | This Study                               | N/A |
| pGEX6p-1GRASP55 N                                 | Kind gift from Yanzhuang Wang            | N/A |
| pGEX4T-1GRASP55 C                                 | Kind gift from Yanzhuang Wang            | N/A |
| pGEX6p-1GRASP55 G97D                              | This Study                               | N/A |
| GRASP55-His tag                                   | Kind gift from Antonino Colanzi          | N/A |
| GRASP65-His tag                                   | Kind gift from Antonino Colanzi          | N/A |

234

235 **Appendix Table S3** siRNA sequences used in this study to downregulate indicated  
236 human gene expression

| Human Gene     | Accession Number | siRNA Sequence                                                                                                                |
|----------------|------------------|-------------------------------------------------------------------------------------------------------------------------------|
| Giantin/GOLGB1 | NM_004487        | #1 5'-GAACUAGAGUCUCGGUAUA-3'<br>#2 5'-UAAGAGAAUUGCAACCUGAA-3'<br>#3 5'-GUACACAGGUUAAGUGCUU-3'<br>#4 5'-GAAGGUCUGUGAUACUCUA-3' |
| GM130/GOLGA2   | NM_004486        | #1 5'-GGACAAUGCUGCUACUCUA-3'<br>#2 5'-AGAAGGAGGUGCUGCAUAA-3'<br>#3 5'-GAAUAUCAGCAGAGGAAUA-3'                                  |

|                  |              |                                                                                                                                    |
|------------------|--------------|------------------------------------------------------------------------------------------------------------------------------------|
|                  |              | #4 5'-UUGUAAAGCUGACUAAUGA-3'                                                                                                       |
| GRASP 65/GORASP1 | NM_031899    | #1 5'-GAUCUCUACCACAGAAUAA-3'<br>#2 5'-CUGGAGGUGUUCAUAUGA-3'<br>#3 5'-GAGGACUUCUUUACGCUCA-3'<br>#4 5'-GGACGUGUCGGGAAUUUCU-3'        |
| GRASP 55/GORASP2 | NM_015530    | #1 5'-GGAGUGAGCAUUCGUUUCU-3'<br>#2 5'-GUAAACCAGUCCCUCACUU-3'<br>#3 5'-GACCACACAGUGAUUAUUAU-3'<br>#4 5'-UGUCGAGAAGUGAUUAUUA-3'      |
| GMAP210/TRIP11   | NM_004239    | #1 5'-GGACAUUACUAAAGAGUUA-3'<br>#2 5'-GGGCAAGACUGGAGAGUUA-3'<br>#3 5'-GAACUUAAGGAGCAUAUUA-3'<br>#4 5'-GGACUUUGGUGAUUAUUU-3'        |
| CERT             | NM_001130105 | #1 5'-GAAGAUGACUUUCCUACAAUU-3'<br>#2 5'-GAAGUUGGCUGAAAUGGAAUU-3'<br>#3 5'-GCGAGAGUAUCCUAAAUUUUU-3'<br>#4 5'-UCAAGGGAUAAAGUGGUUU-3' |
| Golgin 97/GOLGA1 | NM_002077    | #1 5'- AAGAUCACAGCCCUGGAACAA -3'<br>#2 5'- AAGUGCUUCUCCAGAAAGAGC -3'                                                               |
| Golgin 45/BLZF1  | NM_003666    | #1 5'-UGUGAUGUAUGGCGAAGUA-3'<br>#2 5'-GAAUAUUAGUCCCAAAGC-3'<br>#3 5'-GAACGUCUAGCCCGUGAGA-3'                                        |

|                   |              |                                                                                                                                            |
|-------------------|--------------|--------------------------------------------------------------------------------------------------------------------------------------------|
|                   |              | #4 5'-GAACAGUUAGAACGUAUGU-3'                                                                                                               |
| GCC1              | NM_024523    | #1 5'-GGACUUGGAGCUUAGGUUA-3'<br>#2 5'-GGAGAAGGCUACUGCACUC-3'                                                                               |
| GCC2              | NM_181453    | #1 5'-UCAAAGAGAUACCAUGUUA-3'<br>#2 5'-GAGCAGAGUUGAUACUAUU-3'                                                                               |
| Golgin 160/GOLGA3 | NM_005895    | #1 5'-GCAAACAGCCCGUGGGAAA-3'<br>#2 5'-GAGAUGAAGACCAAACAUA-3'                                                                               |
| Golgin 245/GOLGA4 | NM_001172713 | #1 5'-GAACUAACCUGUCAGAUUU-3'<br>#2 5'-GAGAACAGAUUCACAAUUU-3'                                                                               |
| GOLPH3            | NM_022130    | 1# 5'-AAAUGAUGUGUAACCCUCGCGGUCC-3'<br>2 #5'-AAUCCAGAUGAUAUACAGUCAUUC -3'<br>6 #5'-GGAGAGGAAGGUUACAACUA-3'<br>7# 5'-UCAAGGACCGCGAGGGUUA -3' |
| GOLIM4            | NM_014498    | #1 5'-GAACACAGAUCAAGAUUAG-3'<br>#2 5'-GCAGAUGACCCUAAUAAUC-3'                                                                               |
| GOPC              | NM_020399    | #1 5'-GGCCUUGGCAUUUCAAUUA-3'<br>#2 5'-GGACAUCGUUACCGUUUGU-3'                                                                               |

|                                 |              |                                                                                                                                     |
|---------------------------------|--------------|-------------------------------------------------------------------------------------------------------------------------------------|
| GORAB                           | NM_152281    | #1 5'-GCAGAGACCAUGAAACUAA-3'<br>#2 5'-CAGCAAAGCUAGAUUACA-3'                                                                         |
| FAPP2                           | NM_001197026 | #1 5'-GAGAUAGACUGCAGCAUAAUUU-3'<br>#2 5'-GAAUUGAUGUGGGAACUUUUU-3'<br>#3 5'-GAAUCAACCUGUAAUACUUU-3'<br>#4 5'CCUAAGAAAUCCAACAGAAUU-3' |
| AllStars Negative Control siRNA | Qiagen       | Cat #SI03650318                                                                                                                     |

238

239 **Appendix Table S4** List of antibodies used in this study for immunofluorescence  
240 (IF), Western Blotting (WB), cryo-Electron Microscopy (cryo-EM).

| Antibodies                   | SOURCE                   | IDENTIFIER                                        |
|------------------------------|--------------------------|---------------------------------------------------|
| Monoclonal Mouse<br>GMAP210  | BD Biosciences           | Clone 15<br>Cat # 611712<br>RRID:AB_399190        |
| Monoclonal Mouse<br>GM130    | BD Biosciences           | Clone 35<br>Cat # 610822<br>RRID: AB_398141       |
| Polyclonal Rabbit<br>GIANTIN | Abcam                    | Cat # ab24586<br>RRID: AB_448163                  |
| Monoclonal Mouse<br>GRASP65  | Santa Cruz Biotechnology | Clone D12<br>Cat # sc-374423<br>RRID: AB_10991322 |
| Polyclonal Rabbit<br>GOLPH3  | Abcam                    | Clone                                             |



|                                         |                             |                                                  |
|-----------------------------------------|-----------------------------|--------------------------------------------------|
|                                         |                             | Cat # ab98023<br>RRID: AB_10860828               |
| Polyclonal Rabbit<br>B4GALT1            | Sigma                       | Cat # HPA010807<br>RRID: AB_1078254              |
| Monoclonal Mouse<br>GAPDH               | Santa Cruz Biotechnology    | Clone 6C5<br>Cat #sc-32233<br>RRID:AB_627679     |
| Polyclonal Rabbit<br>GRASP55            | Novus Biologicals           | Cat #NBP1-89747<br>RRID:AB_11024556              |
| Monoclonal Mouse<br>HA-Tag              | Biolegend/Covance           | Clone 16B12<br>Cat #MMS-101P<br>RRID:AB_10063630 |
| Monoclonal Rabbit HA-<br>Tag            | Cell Signaling Technology   | Clone C29F4<br>Cat #3724                         |
| Polyclonal Sheep anti-<br>human TGN46   | BioRad/AbD-Serotec          | Cat #AHP500G<br>RRID:AB_323104                   |
| Monoclonal Mouse<br>anti- $\beta$ ACTIN | Sigma                       | Clone AC-74<br>Cat #A2228<br>RRID:AB_476697      |
| Monoclonal Mouse<br>Calnexin            | Santa Cruz<br>Biotechnology | Clone AF18 Cat #sc-23954;<br>RRID: AB_626783     |
| Monoclonal Mouse<br>GFP                 | Abcam                       | Cat #ab6556<br>RRID:AB_305564                    |
| GST                                     | This study                  | N/A                                              |

|                                        |                         |                                              |
|----------------------------------------|-------------------------|----------------------------------------------|
| Anti-polyHistidine                     | Sigma                   | Clone HIS-1<br>Cat #H1029,<br>RRID:AB_260015 |
| ShTxB-CY3                              | Dr. Ludger Johannes     | N/A                                          |
| ChTxB-AlexaFluor 488                   | Invitrogen              | Cat # C-22841                                |
| Anti-mouse, donkey<br>Alexa Fluor 488  | ThermoFisher Scientific | Cat #A-21202<br>RRID:AB_141607               |
| Anti-mouse, donkey<br>Alexa Fluor 568  | ThermoFisher Scientific | Cat #A10037<br>RRID:AB_2534013               |
| Anti-mouse, goat<br>Alexa Fluor 633    | ThermoFisher Scientific | Cat #A-21052<br>RRID:AB_141459               |
| Anti-rabbit, donkey<br>Alexa Fluor 488 | ThermoFisher Scientific | Cat #A-21206<br>RRID:AB_141708               |
| Anti-rabbit, donkey<br>Alexa Fluor 568 | ThermoFisher Scientific | Cat #A10042<br>RRID:AB_2534017               |
| Anti-rabbit, goat Alexa<br>Fluor 633   | ThermoFisher Scientific | Cat #A-21070<br>RRID:AB_2535731              |
| Anti-sheep, donkey<br>Alexa Fluor 633  | ThermoFisher Scientific | Cat #A-21100<br>RRID:AB_2535754              |
| Anti-goat, donkey<br>Alexa Fluor 568   | ThermoFisher Scientific | Cat #A-11057<br>RRID:AB_142581               |

241

242

243 **Appendix Table S5** List of cytosolic peptides used in this study for  
 244 immunoprecipitation assays.

| <b>Cytosolic Tail Peptides</b>                                                                                       |            |     |
|----------------------------------------------------------------------------------------------------------------------|------------|-----|
| B4GALT-1 cytosolic tail peptide<br>Biotin- MRLREPLLSGSAAMPGA -COOH                                                   | This study | N/A |
| LCS cytosolic tail peptide<br>Biotin- MRARRGLLRLPRRSLLA -COOH                                                        | This study | N/A |
| Gb3S cytosolic tail peptide<br>Biotin- MSKPPDLLLRLLRGAPRQRVC-COOH                                                    | This study | N/A |
| GM3S cytosolic tail peptide<br>Biotin-<br>MRTKAAGCAERRPLQPRTEAAAAPAGRAMP<br>SEYTYVKLRSDCSRPSLQWYTRAQSKMRRP<br>S-COOH | This study | N/A |
| GCS Cytosolic tail peptide<br>Biotin-DPTISWRTGRYRLRCGGTAEIILDV-<br>COOH                                              | This study | N/A |
| GCS Δ 3C cytosolic tail peptide<br>Biotin- PTISWRTGRYRLRCGGTAEI -COOH                                                | This study | N/A |

245

246

247 **Appendix Table S6** Primers used in this study to determine mRNA levels of indicated  
 248 gene.

| Human | Forward Primer                       | Reverse Primer                       |
|-------|--------------------------------------|--------------------------------------|
| GCS   | 5'-TTCGGGTTTCGTCCTCTTC-3'            | 5'-<br>GCTTGCTATAAGGCTGTTTGTC-<br>3' |
| LCS   | 5'-<br>CAATCGGTGCTCAGGTTTATG-<br>3'  | 5'-<br>GGTTTCACTGTGGTTCAAGTC-3'      |
| GB3S  | 5'-<br>GATCCCCACCTCTCTGCAAT-3'       | 5'-TTGGACATGGTATCCCCAGA-<br>3'       |
| GM3S  | 5'-TGGTTATTGGAAGCGGAGG-<br>3'        | 5'-TCTGAATATCCCTCAACTGGT-<br>3'      |
| FAPP2 | 5'-<br>ACATCAGGATCCGATTGAGA-<br>3'   | 5'-ATGCACCTTCTGGATGTGTT-<br>3'       |
| CERT  | 5'-<br>TGTGGATCATGACAGTGCTC-<br>3'   | 5'-ATTTCCCTGGTTTCCCTCTGG-<br>3'      |
| SMS1  | 5'-<br>GCATTTCAACTGTTCTCCGAA<br>G-3' | 5'-GATAGACAAGCCACCTCCAG-<br>3'       |

|       |                                    |                                 |
|-------|------------------------------------|---------------------------------|
| HPRT1 | 5'-<br>AGCTTGCTGGTGAAAAGGAC-<br>3' | 5'-<br>GTCAAGGGCATATCCAACAAC-3' |
|-------|------------------------------------|---------------------------------|

249

250 **Appendix Table S7** All the commercial kits used for cDNA extraction and mRNA  
 251 analysis.

| <b>Commercial assays<br/>and kits</b>            |                         |              |
|--------------------------------------------------|-------------------------|--------------|
| RNA easy mini                                    | Qiagen                  | Cat #74106   |
| QuantiTect Reverse<br>Transcription Kit<br>Print | Qiagen                  | Cat #205311  |
| SYBR™ Green PCR<br>Master Mix                    | ThermoFisher Scientific | Cat #4309155 |

252

253

254 **Appendix Table S8** All the Software used for analysis and figure preparation.

| <b>Softwares</b>                           |                       |                                                                                                                                                                               |
|--------------------------------------------|-----------------------|-------------------------------------------------------------------------------------------------------------------------------------------------------------------------------|
| ImageJ                                     | NIH                   | <a href="https://imagej.nih.gov/ij/">https://imagej.nih.gov/ij/</a>                                                                                                           |
| MetaMorph                                  | Molecular Devices     | <a href="https://www.moleculardevices.com/systems/metamorph-research-imaging">https://www.moleculardevices.com/systems/metamorph-research-imaging</a>                         |
| Prism                                      | Graphpad              | <a href="https://www.graphpad.com/scientific-software/prism/">https://www.graphpad.com/scientific-software/prism/</a>                                                         |
| Zen Lite                                   | Carl Zeiss            | <a href="https://www.zeiss.com/microscopy/int/products/microscope-software/zen-lite.html">https://www.zeiss.com/microscopy/int/products/microscope-software/zen-lite.html</a> |
| Adobe Illustrator                          | Adobe                 | <a href="http://www.adobe.com/products/illustrator/free-trial-download.htm">www.adobe.com/products/illustrator/free-trial-download.htm</a>                                    |
| Adobe Photoshop                            | Adobe                 | <a href="http://www.adobe.com/products/photoshop.html">www.adobe.com/products/photoshop.html</a>                                                                              |
| Soft Imaging service (Electron microscope) | Olympus               | <a href="http://www.olympus-sis.com/corp/2256.htm">www.olympus-sis.com/corp/2256.htm</a>                                                                                      |
| iTEM                                       | EMSIS GmbH            | <a href="https://www.emsis.eu/products/software/item/">https://www.emsis.eu/products/software/item/</a>                                                                       |
| Cell profiler                              | Cell Profiler Analyst | <a href="https://cellprofiler.org/releases/">https://cellprofiler.org/releases/</a>                                                                                           |

255
