# Supplementary figures and images for: GRASP55 regulates intra‐Golgi localization of glycosylation enzymes to control glycosphingolipid biosynthesis
Source: PubMed Central journal article supplement — EMBO J. 2021 Sep 13;40(20):e107766. doi: 10.15252/embj.2021107766 (PMC8521277; doi:10.15252/embj.2021107766), 2021-09-13

Figure 5D Source Data

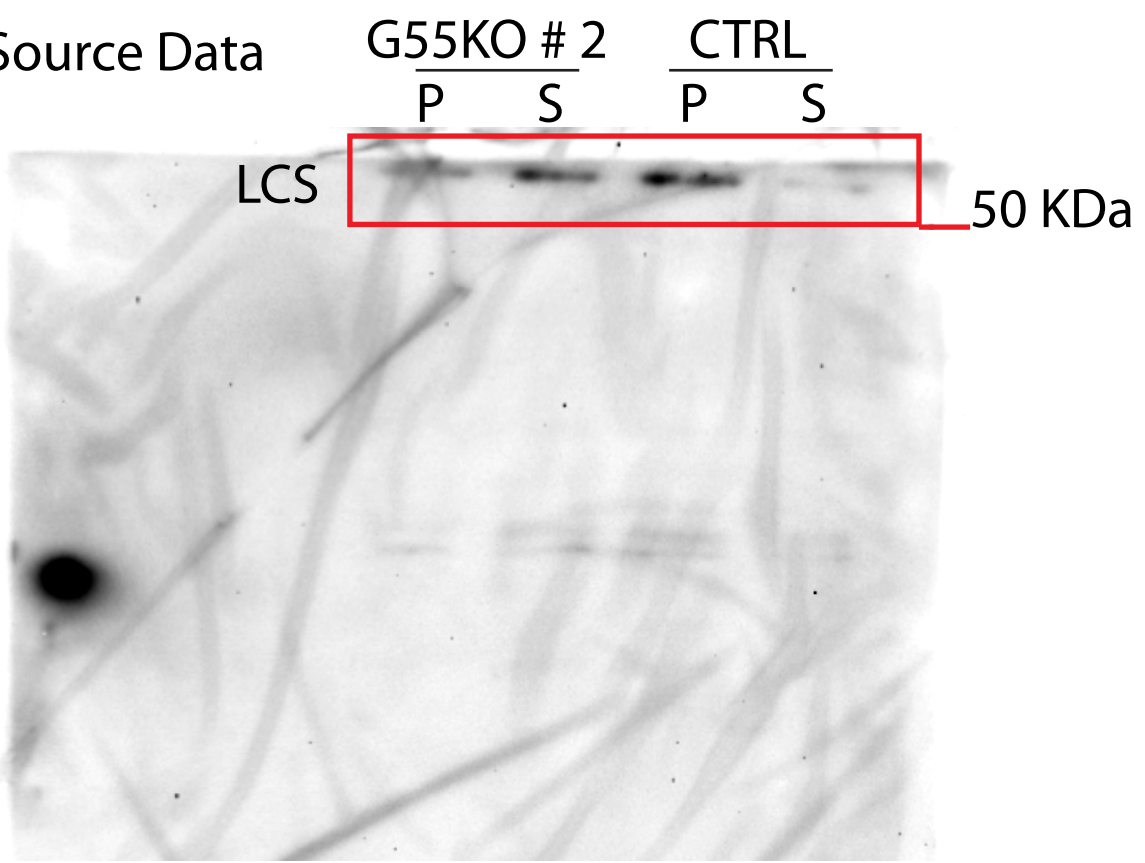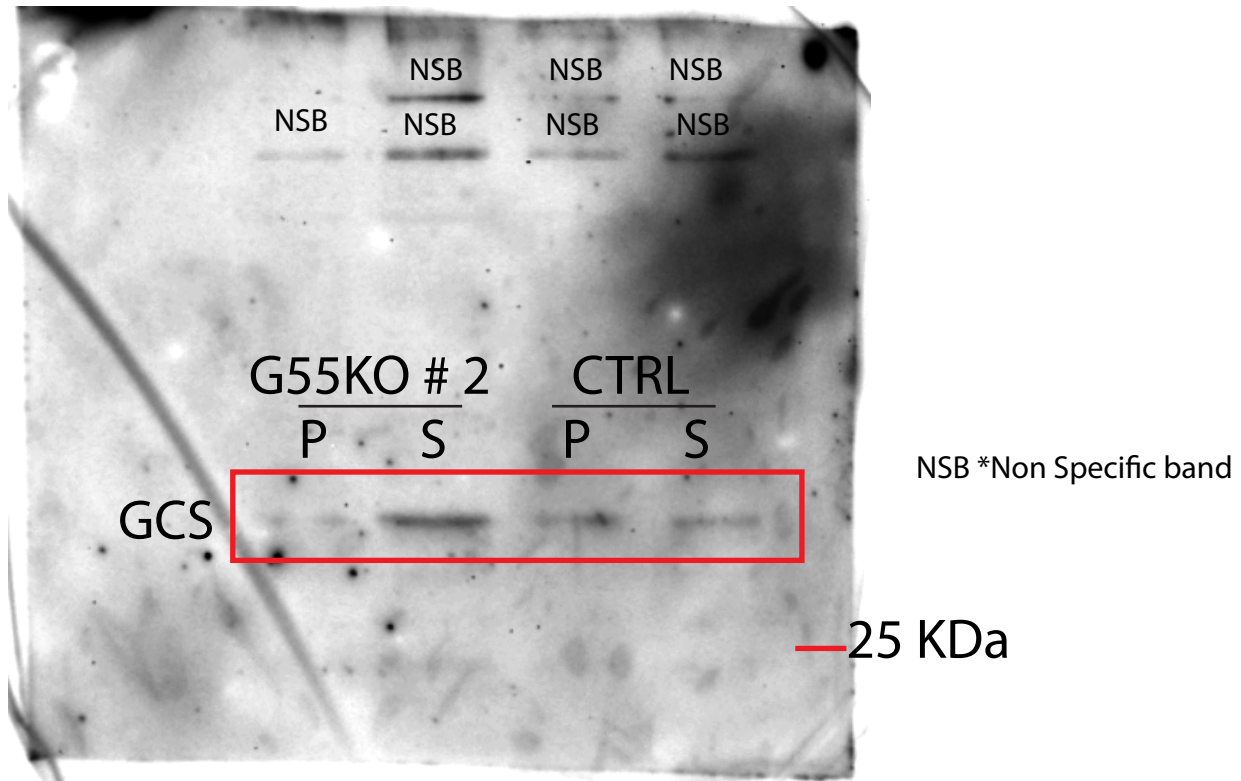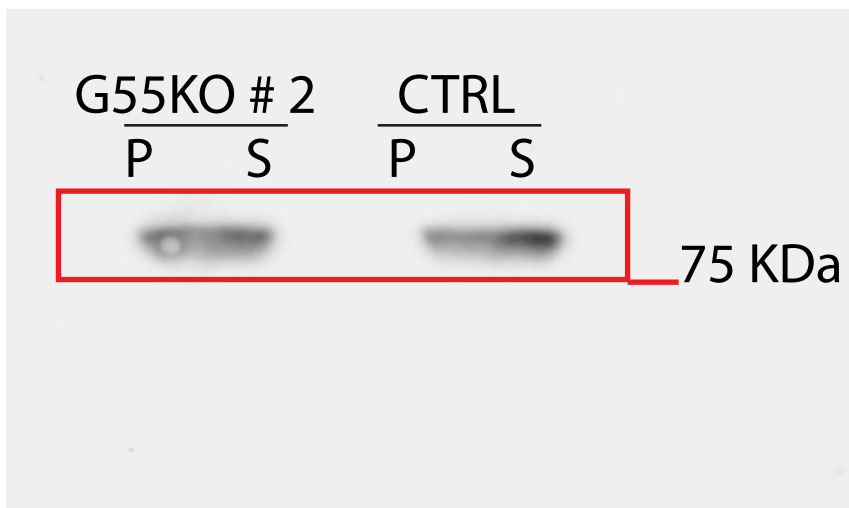

Supplement: EMBJ-40-e107766-s003.pdf [file EMBJ-40-e107766-s003.pdf]
